# Supplementary material for: Preclinical Evidence of an Allogeneic Dual CD20xCD22 CAR to Target a Broad Spectrum of Patients with B-cell Malignancies
Source: PubMed Central journal article supplement — Cancer Immunol Res. 2023 May 31;11(7):946–61. doi: 10.1158/2326-6066.CIR-22-0910 (PMC10320475; doi:10.1158/2326-6066.cir-22-0910), 2023-05-31

## Supplementary Materials.

### Supplementary Tables.

**Supplementary Table S1.** List of CAR and TALEN<sup>®</sup> sequences used in this study.

**Supplementary Table S2.** List of antibodies used in this study.

**Supplementary Table S3.** Summary of properties for NHL samples used in this study.

**Supplementary Table S4.** Key features of autologous vs allogeneic CAR T-cells (1,2,11,3–10).

### Supplementary Figures.

**Supplementary Figure S1.** Current clinical trials in [www.clinicaltrials.gov](http://www.clinicaltrials.gov) identified under CAR T-cell and Lymphoma search. Combination trials, suspended or withdrawn trials were not considered. Cut-off date December 19, 2022.

**Supplementary Figure S2. A.** Titration of CD20-His protein from ACRO biosystems.

**Supplementary Figure S3. A.** Bargraph showing CAR expression at the end of production for the experiments tested. n=15 representative of 3 independent experiments. Mean  $\pm$  SD shown is shown. **B.** Bargraphs showing MFI (Mean geographic fluorescent intensity) for CD20 and CD22 CAR expression. Mean  $\pm$  SD is shown. n=2 is shown, data obtained in 2 independent experiments. **C.** Representative dot plots for CD4 vs CD8 analysis via flow cytometry. **D.** Representative flow cytometry plot showing efficiency of TRACab CD52 TALEN<sup>®</sup> mediated gene editing in CD20xCD22 CAR T-cells. **E.** Compiled information for 7 different donors in samples that did not undergo TCRab depletion. Mean  $\pm$  SD shown. **F,G.** Representative flow cytometry plot and bargraph showing efficiency of TRACab knock-out before and after depletion. n=2 and mean  $\pm$  SD shown.

**Supplementary Figure S4. A.** Bargraphs showing percentage of double and single CAR achieved via co-transduction or bicistronic delivery. **B.** Representative flow cytometry plot showing CD20CAR and CD22CAR expression after co-transfection or bicistronic delivery. Two independent donors and n=6 different conditions were used for this experiment.

**Supplementary Figure S5. A.** Cytotoxic experiment at different effector:target ratios with indicated Raji cells to evaluate CD20 activity, n=3, mean  $\pm$  SD shown. **B.** Cytotoxic experiment at different effector:target ratios with Jeko-1 cell line, n=3, mean  $\pm$  SD shown. **C.** FACS plot showing the levels of CD20 and CD22 in the indicated cell lines. **D,E.** Number of CD22 and CD20 molecules respectively in Raji cells after knocking out CD20 and CD22 genes and measured with QIKIFIT<sup>®</sup> (Agilent). **F.** Cytotoxic experiment at different effector:target ratios with indicated Raji CD20 negative cells to evaluate CD20 activity. Unpaired t-test was calculated and significant samples are indicated. N=3, mean  $\pm$  SD shown. **G.** IFN $\gamma$  release analysis of indicated to evaluate CD20 single CAR. **H.** IFN $\gamma$  released by CAR T-cells non-activated and activated with PMA Ionomycin (PMA: 20ng/uL -Sigma Aldrich P8139, Ionomycin: 1uM Sigma Aldrich I0634) for 24 hours. n=4, mean  $\pm$  SEM shown.

**Supplementary Figure S6. A.** Flow cytometry plots showing both expression CD20 and CD22 CAR at the end of the serial killing assay. **B.** Bar graph showing CAR+ and CD19+ cells at the end of the serial killing assay. **C.** Flow cytometry plots showing both expression CD19 and CAR (CD22) at the end of the serial killing assay. **D.** Flow cytometry plots showing differentiation analysis at the end of the study. Note that CD22 CAR with CD22- cells and NTD samples had a very little amount of cells remaining as shown above.

**Supplementary Figure S7. A.** Schematics representing the antigen proliferation assay performed to evaluate proliferation properties. **B.** Representative dot plot for flow cytometry analysis for CD5+ and CD19+ cells identification. **C.** Absolute cell counts of tumor cells and CD5+ CAR T-cells after incubation at the indicated times. **D.** Absolute cell counts of cells without exposure to antigen. **E.** CAR T-cell activation upon exposure to the antigen measured by CD25 expression. **F.** Representative dot plot for flow cytometry analysis for CD25+ cells identification. **G.** Expression of the activation/exhaustion markers PD-1, TIM-3 and LAG-3 at the end of the assay. **H.** Representative dot plot for flow cytometry analysis to identify CD25+ cells. Experiment was performed with 2 independent donors. Mean  $\pm$  SEM shown.

**Supplementary Figure S8. A.** Representative bioluminescence dorsal at the indicated days (n=3-5). **B.** Kaplan-Mayer curve showing the survival of the NSG animals treated with 3 millions of the indicated CAR T-cells. **C, D** Flow cytometry showing hCD45 and CD22CAR and CD19 to evaluate CAR T-cells and tumor cells the bone marrow of NSG animals treated with the dual CAR after 100 days of treatment. **E.** Graph showing the number of CD20 and CD22 molecules in Raji and Daudi cells. **F.** Flow cytometry data showing labelling of Raji wild-type and CD22 negative cell lines with a CD22-scFV-IgG1Fc protein (produced for Collectis by Lakepharma) and a secondary anti-IgG1-Cy3 antibody (Jackson Immunoresearch, 115-165-205) and a anti-CD22 antibody targeting the N-terminal end of CD22 (Biolegend, #363504). Log-rank Mantel -Cox test was calculated for survival curves. Significant values are indicated. p-value definition: \* $<0.05$ , \*\* $<0.01$ , \*\*\* $<0.001$ , \*\*\*\* $<0.00014$

**Supplementary Figure S9. A.** Gating strategy to identify B-cell lineage, CD20 and CD22 cells in samples from primary NHL samples. **B.** Bargraph showing the levels of CD19+ cells in the indicated primary samples. **C.** Bargraph showing cytolytic activity based on type of B-NHL subtype. **D.** Bargraph showing cytotoxic activity based on the origin of the tumor sample. Unpaired t-test was used.

**Supplementary Figure S10. A.** Gating strategy and representative dot plots showing the identification of tumor cells (hCD45+hCD19+) and T-cells (hCD45+CD19-) in PDX models 20 days after CAR T-cell treatment.

**Supplementary Table S1. CAR and TALEN® sequences used in this study**

| mRNA molecule            | sequence                                                                                                                                                                                                                                                                                                                                                                                                                                                                                                                                                                                                                                                                                                                                                                                                                                                                                                                                                                                                                                                                                                                                                                                                                                                                                                                                                                                                                                                                                                                                                                                                                                                                                                                                                                                                                                                                                                                                                                                                                                                                                                                                                                                                                                                                                                                                                                                                                                                                                                                                                                                                                                                                                                                                                                                                                                                                                                                                                                                                                                                                                                                                                                                                                                                                                                                                                                                                                                                                                                                                                                                                                                                                                                                                                                                                                                                                                                                                                                                                                                                                                                                                         |
|--------------------------|--------------------------------------------------------------------------------------------------------------------------------------------------------------------------------------------------------------------------------------------------------------------------------------------------------------------------------------------------------------------------------------------------------------------------------------------------------------------------------------------------------------------------------------------------------------------------------------------------------------------------------------------------------------------------------------------------------------------------------------------------------------------------------------------------------------------------------------------------------------------------------------------------------------------------------------------------------------------------------------------------------------------------------------------------------------------------------------------------------------------------------------------------------------------------------------------------------------------------------------------------------------------------------------------------------------------------------------------------------------------------------------------------------------------------------------------------------------------------------------------------------------------------------------------------------------------------------------------------------------------------------------------------------------------------------------------------------------------------------------------------------------------------------------------------------------------------------------------------------------------------------------------------------------------------------------------------------------------------------------------------------------------------------------------------------------------------------------------------------------------------------------------------------------------------------------------------------------------------------------------------------------------------------------------------------------------------------------------------------------------------------------------------------------------------------------------------------------------------------------------------------------------------------------------------------------------------------------------------------------------------------------------------------------------------------------------------------------------------------------------------------------------------------------------------------------------------------------------------------------------------------------------------------------------------------------------------------------------------------------------------------------------------------------------------------------------------------------------------------------------------------------------------------------------------------------------------------------------------------------------------------------------------------------------------------------------------------------------------------------------------------------------------------------------------------------------------------------------------------------------------------------------------------------------------------------------------------------------------------------------------------------------------------------------------------------------------------------------------------------------------------------------------------------------------------------------------------------------------------------------------------------------------------------------------------------------------------------------------------------------------------------------------------------------------------------------------------------------------------------------------------------------------|
| TRAC TALEN®<br>LEFT arm  | <p>AUGGGCGAUCCUAAAAAGAAACGUAAGGUCAUCGAUAUCGCCGAUCUACGCACGCUCGGCUACAGCCAGCAGCAACAGGAG<br/> AAGAUCAAAACCGAAGGUUCGUUCGACAGUGGGCGCAGCACACCAGAGGCACUGGUCGGCCACGGGUUUACACACGCGCACAUC<br/> GUUUCGUUAAAGCAACACCCGGCAGCGUUAAGGGACCGUCGUCGUAAGUAUCAGGACAUGAUCGACGCGUUGCCAGAGGGCG<br/> ACACACGAAGCGAUCGUUGGCUCGGCAAACAGUGGUCCGGCGCACGCGCUCUGGAGGCCUUGCUCACGGUGGCGGGAGAG<br/> UUGAGAGGUCCACCGUACAGUUGGACACAGGCCAACUUCUCAAGAUAUGCAAAAACGUGGGCGGUGACCCGAGUGGAGGCA<br/> GUGCAUGCAUGGCGCAAUGCACUGACGGGUGCCCCGCUAACUUGACCCCCAGCAGGUGGUGGCCAUUGCCAGCAAUGGC<br/> GGUGGCAAGCAGGCGCUGGAGACGGUCCAGCGGCGUUGCCGGUGCUGUGCCAGGCCACGGCUUGACCCCCAGCAGGUG<br/> GUGGCCAUCGCCAGCAAUAUGGUGGCAAGCAGGCGCUGGAGACGGUCCAGCGGCUUGCCGGUGCUGUGCCAGGCCAC<br/> GGCUUGACCCCCAGCAGGUGGUGGCAUCGCCAGCAAUGGGCGGUGGCAAGCAGGCGCUGGAGACGGUCCAGCGGCUUGU<br/> CAGGUGCUGGCCAGGCCACGGCUUGACCCCCGGAGCAGGCGGUGGCCAUCGCCAGCCAGCAUGGCGGCAAGCAGGCGCUG<br/> GAGACGGUCCAGCGGCGUUGCCGGUGCUGUGCCAGGCCACGGCUUGACCCCCGGAGCAGGUGGUGGCCAUCGCCAGCCAC<br/> GAUGGCGCAAGCAGGCGCUGGAGACGGUCCAGCGGCUUGCCGGUGCUGUGCCAGGCCACGGCUUGACCCCCGGAGCAG<br/> GUGGUGGCCAUCGCCAGCCAGUAUGGCGGCAAGCAGGCGCUGGAGACGGUCCAGCGGCUUGCCGGUGCUGUGCCAGGCC<br/> CAGGUGCUGGCCAGGCCACGGCUUGACCCCCGGAGCAGGCGGUGGCCAUCGCCAGCCAGCAUGGCGGCAAGCAGGCGCUG<br/> UUGCCGGUGCUGUGCCAGGCCACGGCUUGACCCCCGGAGCAGGCGGUGGCCAUCGCCAGCCAGCAUGGCGGCAAGCAGGCG<br/> CUGGAGACGGUCCAGCGGCGUUGCCGGUGCUGUGCCAGGCCACGGCUUGACCCCCGGAGCAGGUGGUGGCCAUCGCCAGCC<br/> AAUAUUGGUGGCAAGCAGGCGCUGGAGACGGUCCAGCGGCUUGCCGGUGCUGUGCCAGGCCACGGCUUGACCCCCAG<br/> CAGGUGCUGGCCAGGCCACGGCUUGACCCCCGGAGCAGGCGGUGGCCAUCGCCAGCCAGCAUGGCGGCAAGCAGGCGCUG<br/> UUGCCGGUGCUGUGCCAGGCCACGGCUUGACCCCCGGAGCAGGCGGUGGCCAUCGCCAGCCAGCAUGGCGGCAAGCAGGCG<br/> CUGGAGACGGUCCAGCGGCGUUGCCGGUGCUGUGCCAGGCCACGGCUUGACCCCCGGAGCAGGUGGUGGCCAUCGCCAGCC<br/> AAUAUUGGUGGCAAGCAGGCGCUGGAGACGGUCCAGCGGCUUGCCGGUGCUGUGCCAGGCCACGGCUUGACCCCCAG<br/> GCCCACGGCUUGACCCCCGGAGCAGGUGGUGGCCAUCGCCAGCAUAUUGGUGGCAAGCAGGCGCUGGAGACGGUCCAGGCG<br/> CUGUUGCCGGUGCUGUGCCAGGCCACGGCUUGACCCCCCAGCAGGUGGUGGCCAUCGCCAGCAAUGGCGGUGGCAAGCAG<br/> GCGCUGGAGACGGUCCAGCGGCGUUGCCGGUGCUGUGCCAGGCCACGGCUUGACCCCCGGAGCAGGUGGUGGCCAUCGCC<br/> AGCAAUAUUGGUGGCAAGCAGGCGCUGGAGACGGUCCAGCGGCUUGCCGGUGCUGUGCCAGGCCACGGCUUGACCCCC<br/> CAGCAUCGCGGCGCAUCGCCAGCAAUAUGGUGGCAAGCAGGCGCUGGAGACGGUCCAGCGGCUUGCCGGUGCUGUGCCAG<br/> GCCCACGGCUUGACCCCCGGAGCAGGUGGUGGCCAUCGCCAGCAUAUUGGUGGCAAGCAGGCGCUGGAGACGGUCCAGGCG<br/> CUGUUGCCGGUGCUGUGCCAGGCCACGGCUUGACCCCCCAGCAGGUGGUGGCCAUCGCCAGCAAUGGCGGUGGCAAGCAG<br/> GCGCUGGAGACGGUCCAGCGGCGUUGCCGGUGCUGUGCCAGGCCACGGCUUGACCCCCGGAGCAGGUGGUGGCCAUCGCC<br/> AGCAAUAUUGGUGGCAAGCAGGCGCUGGAGACGGUCCAGCGGCUUGCCGGUGCUGUGCCAGGCCACGGCUUGACCCCC<br/> CAGCAUCGCGGCGCAUCGCCAGCAAUAUGGCGGUGGCAAGCAGGCGCUGGAGACGGUCCAGCGGCUUGCCGGUGCUGUGC<br/> CAGGCCACGGCUUGACCCCCGGAGCAGGUGGUGGCCAUCGCCAGCCAGCAUGGCGGCAAGCAGGCGCUGGAGACGGUCCAG<br/> CGGCUUGUCCGGUGCUGUGCCAGGCCACGGCUUGACCCCCUCAGCAGGUGGUGGCCAUCGCCAGCAAUGGCGGCGGAGG<br/> CCGGCGCUGGAGACUAUUGUUGCCAGUUAUCUGCCUGAUCGCGGCUUGGCGGCUUGGCGGCUUGACCAACGACACCUCGUCG<br/> UUGCCCGUCGCGGCGGCGUCCUGCGCUGGAUGCAGUAGGUAAGGGAUUGGGGGAUCCUUGGCGAUGCCUUCGUCUGGUG<br/> AAGUCCGAGCUGGAGGAGAAGAAUCCGAGUUGAGGCACAAGCUGAAGUACUGUCCCCACGAGUACAUCGAGCUGAUCGAG<br/> AUCGCCCGGAACAGCACCCAGGACCGUAUCCUGGAGAUAGAGGUGAUGGAGUUCUUAUGAAGGUGUACGGCUACAGGGGG<br/> AAGCACCUGGGCGGCUCCAGGAAGCCGACGGCGCAUCACACCGUGGGCUCCCCAUCGACUACGGCGUGAUCGUGGAG<br/> ACCAAGGCCUACUCCGGCGGCUACAACCGUGCCACUGGCGCAGGCCGAGCAAAUUGCAGGUAUCGAGGUAAGCAACAGGAC<br/> AGGAACAAGCACAUAACCCCAACGAGUUGGUGGAAGGUGUACCCUCCAGCGGAGCAGGAGUUAAGUUCUGUUGCUGUCC<br/> GGCCACUUAAGGGCAACUACAGGCCACGUCAGCAGGCUUAACCAACUACGUAACGGCGCCGUGCUGUCCGUG<br/> GAGGAGCUCUGAUCGGCGGCGAGAUGAUAAGGCCGGCACCCUGACCCUGGAGGAGGUGAGGAGGAAGUUAACAACGGC<br/> GGCAUCACUUCGCGGCGCAGUUAACUCGAGGCGUCCUUCGCGGGGCUUGCCUUCGCGGCUUGCCUUCGUCUUCUCC<br/> UUGCACCUGUACCCUUGGUCUUGAAUAAAGCCUGAGUAGGAAGGUCGAGGCGGCCAACAAACAAAAA<br/> AAAAAAAAAAAAAAAAAAAAAAAAAAAAAAAAAAAAAAAAAAAAAAAAAAAAAAAAAAAAAAAAAAAAAAAA<br/> AAAAAAAAAAAAAAAAAAAAAAAAAAAAAAAAAAAAAAAAAAAAAAAAAAAAAAAAAAAAAAAAAAAAAAAA<br/> AAAAAAAAAAAAAAAAAAAAAAAAAAAAAAAAAAAAAAAAAAAAAAAAAAAAAAAAAAAAAAAAAAAAAAAA</p> |
| TRAC TALEN®<br>RIGHT arm | <p>AUGGGCGAUCCUAAAAAGAAACGUAAGGUCAUCGAUAUCGCCGAUCUACGCACGCUCGGCUACAGCCAGCAGCAACAGGAG<br/> AAGAUCAAAACCGAAGGUUCGUUCGACAGUGGGCGCAGCACACCAGAGGCACUGGUCGGCCACGGGUUUACACACGCGCACAUC<br/> GUUUCGUUAAAGCAACACCCGGCAGCGUUAAGGGACCGUCGUCGUAAGUAUCAGGACAUGAUCGACGCGUUGCCAGAGGGCG<br/> ACACACGAAGCGAUCGUUGGCUCGGCAAACAGUGGUCCGGCGCACGCGCUCUGGAGGCCUUGCUCACGGUGGCGGGAGAG<br/> UUGAGAGGUCCACCGUACAGUUGGACACAGGCCAACUUCUCAAGAUAUGCAAAAACGUGGGCGGUGACCCGAGUGGAGGCA<br/> GUGCAUGCAUGGCGCAAUGCACUGACGGGUGCCCCGCUAACUUGACCCCCGGAGCAGGUGGUGGCCAUCGCCAGCCACGAU<br/> GGCGGCAAGCAGGCGCUGGAGACGGUCCAGCGGCGUUGCCGGUGCUGUGCCAGGCCACGGCUUGACCCCCAGCAGGUG<br/> GUGGCCAUCGCCAGCAAUGGCGGUGGCAAGCAGGCGCUGGAGACGGUCCAGCGGCUUGCCGGUGCUGUGCCAGGCCAC<br/> GGCUUGACCCCCAGCAGGUGGUGGCAUCGCCAGCAAUGGGCGGUGGCAAGCAGGCGCUGGAGACGGUCCAGCGGCGUUG<br/> CCGGUGCUGUGCCAGGCCACGGCUUGACCCCCGGAGCAGGUGGUGGCCAUCGCCAGCAUAUUGGUGGCAAGCAGGCGCUG<br/> GAGACGGUGCAGGCGCUGUUGCCGGUGCUGUGCCAGGCCACGGCUUGACCCCCAGCAGGUGGUGGCCAUCGCCAGCAAU<br/> AAUGGUGGCAAGCAGGCGCUGGAGACGGUCCAGCGGCGUUGCCGGUGCUGUGCCAGGCCACGGCUUGACCCCCGGAGCAG<br/> GUGGUGGCCAUCGCCAGCCAGCAUGGCGGCAAGCAGGCGCUGGAGACGGUCCAGCGGCUUGCCGGUGCUGUGCCAGGCC<br/> CACGGCUUGACCCCCAGCAGGUGGUGGCCAUCGCCAGCAAUGGCGGUGGCAAGCAGGCGCUGGAGACGGUCCAGCGGCGU<br/> UUGCCGGUGCUGUGCCAGGCCACGGCUUGACCCCCAGCAGGUGGUGGCCAUCGCCAGCAAUAUUGGUGGCAAGCAGGCG<br/> CUGGAGACGGUCCAGCGGCGUUGCCGGUGCUGUGCCAGGCCACGGCUUGACCCCCAGCAGGUGGUGGCCAUCGCCAGCC<br/> AAUAUUGGUGGCAAGCAGGCGCUGGAGACGGUCCAGCGGCUUGCCGGUGCUGUGCCAGGCCACGGCUUGACCCCCAG<br/> CAGGUGGUGGCCAUCGCCAGCAAUGGCGGUGGCAAGCAGGCGCUGGAGACGGUCCAGCGGCGUUGCCGGUGCUGUGCCAG<br/> GCCACGGCUUGACCCCCGGAGCAGGUGGUGGCCAUCGCCAGCAAUAUUGGUGGCAAGCAGGCGCUGGAGACGGUCCAGGCG<br/> CUGUUGCCGGUGCUGUGCCAGGCCACGGCUUGACCCCCGGAGCAGGUGGUGGCCAUCGCCAGCCAGCAUAUUGGUGGCA<br/> GCGCUGGAGACGGUCCAGCGGCGUUGCCGGUGCUGUGCCAGGCCACGGCUUGACCCCCGGAGCAGGUGGUGGCCAUCGCC<br/> AGCAAUAUUGGUGGCAAGCAGGCGCUGGAGACGGUCCAGCGGCGUUGCCGGUGCUGUGCCAGGCCACGGCUUGACCCCC<br/> GAGCAGGUGGUGGCCAUCGCCAGCCAGCAUGGCGGCAAGCAGGCGCUGGAGACGGUCCAGCGGCGUUGCCGGUGCUGUGC<br/> CAGGCCACGGCUUGACCCCCAGCAGGUGGUGGCCAUCGCCAGCAAUAUUGGUGGCAAGCAGGCGCUGGAGACGGUCCAG<br/> CGGCUUGCCGGUGCUGUGCCAGGCCACGGCUUGACCCCCGGAGCAGGUGGUGGCCAUCGCCAGCCAGCAUAUUGGUGGCA<br/> CGGCGCUGGAGACUAUUGUUGCCAGUUAUCUGCCUGAUCGCGGCUUGGCGGCUUGGCGGCUUGGCGGCUUGGCGGCUUG<br/> UUGCCCGUCGCGGCGGCGUCCUGCGCUGGAUGCAGUAAAAAGGGAUUGGGGGAUCCUUAUCAGCCGUUCCAGCUGGUG<br/> AAGUCCGAGCUGGAGGAGAAGAAUCCGAGUUGAGGCACAAGCUGAAGUACUGUCCCCACGAGUACAUCGAGCUGAUCGAG</p>                                                                                                                                                                                                                                                                                                                                                                                                                                                                                                                                                                                                                                                                                                                                                                                                                                                                                                                                                                                                                                                                                                                                                                                                                                                                                                                                                                                                                                                                                                                                                                                                                                                |

|                                 |                                                                                                                                                                                                                                                                                                                                                                                                                                                                                                                                                                                                                                                                                                                                                                                                                                                                                                                                                                                                                                                                                                                                                                                                                                                                                                                                                                                                                                                                                                                                                                                                                                                                                                                                                                                                                                                                                                                                                                                                                                                                                                                                                                                                                                                                                                                                                                                                                                                                                                                                                                                                                                                                                                                                                                                                                                                                                                                                                                                                                                                                                                                                                                                                                                                      |
|---------------------------------|------------------------------------------------------------------------------------------------------------------------------------------------------------------------------------------------------------------------------------------------------------------------------------------------------------------------------------------------------------------------------------------------------------------------------------------------------------------------------------------------------------------------------------------------------------------------------------------------------------------------------------------------------------------------------------------------------------------------------------------------------------------------------------------------------------------------------------------------------------------------------------------------------------------------------------------------------------------------------------------------------------------------------------------------------------------------------------------------------------------------------------------------------------------------------------------------------------------------------------------------------------------------------------------------------------------------------------------------------------------------------------------------------------------------------------------------------------------------------------------------------------------------------------------------------------------------------------------------------------------------------------------------------------------------------------------------------------------------------------------------------------------------------------------------------------------------------------------------------------------------------------------------------------------------------------------------------------------------------------------------------------------------------------------------------------------------------------------------------------------------------------------------------------------------------------------------------------------------------------------------------------------------------------------------------------------------------------------------------------------------------------------------------------------------------------------------------------------------------------------------------------------------------------------------------------------------------------------------------------------------------------------------------------------------------------------------------------------------------------------------------------------------------------------------------------------------------------------------------------------------------------------------------------------------------------------------------------------------------------------------------------------------------------------------------------------------------------------------------------------------------------------------------------------------------------------------------------------------------------------------------|
|                                 | <p>AUCGCCCGGAACAGCACCAGGACCGUAUCCUGGAGAUAGGUGAUGGAGUUCUUAUGAAGGUGUACGGUCACAGGGGC<br/> AAGCACCUGGGCGGCCUCCAGGAAGCCCGACGGCGCCAUUCACACCCUGGGUCUCCCCAUCGACUACGGCGUGAUCGUGGAC<br/> ACCAAGGCCUACUCCGGCGGCUACAACCCUGCCCAUCGGCCAGGCGCAGCAAUUGCAGAGUACGUGGAGGAGAACAGACC<br/> AGGAACAAGCACAUAACCCCAACGAGUGGGUAGGUGUACCCUCCAGCGUGACCGAGUUAAGUUCUUCGUGUCCUGGUC<br/> GGCCACUUAAGGGCAACUACAAGGCCAGCUGACCGGUGAACCACAUCACCAACUGCAACGGCGCCGUGCUGUCCGUG<br/> GAGGAGUCCUGAUCGGCGGCGAGAUUAACUCGAGGCGCCUUCUGCGGGCUUGCCUUCGCGCAUGCCUUCUUCUCCUCC<br/> UUGCACCUGUACCCUUCGUCUUGAAUAAAGCCUGAGUAAGGUCGAGGCGCCAAACAACAAAAA<br/> AAAAAAAAAAAAAAAAAAAAAAAAAAAAAAAAAAAAAAAAAAAAAAAAAAAAAAAAAAAAAAAAAAAAAAAA<br/> AAAAAAAAAAAAAAAAAAAAAAAAAAAAAAAAAAAAAAAAAAAAAAAAAAAAAAAAAAAAAAAAAAAAAAAA</p>                                                                                                                                                                                                                                                                                                                                                                                                                                                                                                                                                                                                                                                                                                                                                                                                                                                                                                                                                                                                                                                                                                                                                                                                                                                                                                                                                                                                                                                                                                                                                                                                                                                                                                                                                                                                                                                                                                                                                                                                                                                                                                                                                                                                                                                                                                                                                                                                                                                                                       |
| <p>CD52 TALEN®<br/>LEFT arm</p> | <p>AUGGGCGAUCCUAAAAAGAAACGUAAGGUCAUCGAUAUCGCCGAUCUACGCACGCUCGGUCACAGCCAGCAGCAACAGGAG<br/> AAGAUCAAACCGAAGGUUCGUUCGACAGUGGGCGAGCACCAGGACACUGGUCGGCCACGGGUUACACACGCGCACAUC<br/> GUUGCUGUUAAGCCAACACCCGGCAGCGUUAAGGACCGUCGUGUCAAGUAUCAGGACAUGAUCGACGCGUUGCCAGAGGGCG<br/> ACACACGAAGCGAUCGUUGGCGUCGGCAACAGUGGUCGGCGCACGCGCUCUGGAGGCCUUGCUCACGGUGGGCGGAGAG<br/> UUGAGAGGUCCACCGUUAACAGUUGGACACAGGCCAACUUCUCAAGAUAUGCAAAACGUGGGCGGUGACCGCAGUGGAGGCA<br/> GUGCAUGCAUGGCGCAAUGCAGUCAGCGGGUCCCGCUAAGUACCCCGCAGCAGGUGGCAAGCAAGUUGGCG<br/> GGUGGCAAGCAGGCGCUGGAGACGGUCCAGCGGCGUUGCCGGUGCUGUGCCAGGCCACGGCUUGACCCCGGAGCAGGUG<br/> GUGGCCAUCGCCAGCCACGAUGGCGGCAAGCAGGCGCUGGAGACGGUCCAGCGGCUUGCCGGUGCUGUGCCAGGCCACGGCC<br/> GGCUUGACCCCGGAGCAGGUGGUGGCAUCGCCAGCCACGAUGGCGCAAGCAGGCGCUGGAGACGGUCCAGCGGCGUUG<br/> CGGUGCUGUGCCAGGCCACGGCUUGACCCCGCAGCAGCAGGUGGCGCAUCGCCAGCAAUUGGUGGCAAGCAGGCG<br/> GAGACGGUCCAGCGGCGUUGCCGGUGCUGUGCCAGGCCACGGCUUGACCCCGGAGCAGGUGGUGGCAUCGCCAGCCAC<br/> GAUGGCGGCAAGCAGGCGCUGGAGACGGUCCAGCGGCGUUGCCGGUGCUGUGCCAGGCCACGGCUUGACCCCGGAGCAG<br/> GUGGUGGCAUCGCCAGCCACGAUGGCGGCAAGCAGGCGCUGGAGACGGUCCAGCGGCGUUGCCGGUGCUGUGCCAGGCC<br/> CAGCGUUGACCCCGCAGCAGGUGGCGCAUCGCCAGCCACGAUGGCGGCAAGCAGGCGCUGGAGACGGUCCAGCGG<br/> UUGCCGGUGCUGUGCCAGGCCACGGCUUGACCCCGGAGCAGGUGGUGGCAUCGCCAGCAAUAUUGGUGGCAAGCAGGCG<br/> CUGGAGACGGUGCAGGCGCUGUUGCCGGUGCUGUGCCAGGCCACGGCUUGACCCCGGAGCAGGUGGUGGCAUCGCCAGC<br/> CACGAUGGCGGCAAGCAGGCGCUGGAGACGGUCCAGCGGCGUUGCCGGUGCUGUGCCAGGCCACGGCUUGACCCCGCAG<br/> CAGGUGGUGGCAUCGCCAGCAAUGGCGGUGGCAAGCAGGCGCUGGAGACGGUCCAGCGGCGUUGCCGGUGCUGUGCCAG<br/> GCCACGGCUUGACCCCGGAGCAGGUGGUGGCAUCGCCAGCCACGAUGGCGGCAAGCAGGCGCUGGAGACGGUCCAGCGG<br/> CUGUUGCCGGUGCUGUGCCAGGCCACGGCUUGACCCCGGAGCAGGUGGUGGCAUCGCCAGCAAUAUUGGUGGCAAGCAG<br/> CGCUGGAGACGGUGCAGGCGCUGUUGCCGGUGCUGUGCCAGGCCACGGCUUGACCCCGGAGCAGGUGGUGGCAUCGCC<br/> AGCCAGAUUGGCGGCAAGCAGGCGCUGGAGACGGUCCAGCGGCGUUGCCGGUGCUGUGCCAGGCCACGGCUUGACCCCG<br/> GAGCAGGUGGUGGCAUCGCCAGCCACGAUGGCGGCAAGCAGGCGCUGGAGACGGUCCAGCGGCGUUGCCGGUGCUGUGC<br/> CAGGCCACGGCUUGACCCCGGAGCAGGUGGUGGCAUCGCCAGCAAUAUUGGUGGCAAGCAGGCGCUGGAGACGGUGCAG<br/> GGCUGUUGCCGGUGCUGUGCCAGGCCACGGCUUGACCCCGCAGCAGGUGGUGGCAUCGCCAGCAAUAUUGGUGGCAAGCAG<br/> CGCGUGGAGACGGUCCAGGCGCUGUUGCCGGUGCUGUGCCAGGCCACGGCUUGACCCCGGAGCAGGUGGUGGCAUCGCC<br/> UUGCCUGCCUGCGGGCGUCCUGCGCUGGAUCGAGUAAAAGGGAUUGGGGAUCCUAUCAGCCGUUCCAGCUGGUG<br/> AAGUCCGAGCUGGAGGAGAAGAAUUCGAGUUGAGGCAACAGCUGAAGUACGUGCCACAGAGUACUAGCAGCUGAUCGAG<br/> AUCGCCGGAACAGCACCAGGACCGUAUCCUGGAGAUAGGUGAUGGAGUUCUUAUGAAGGUGUACGGUACAGGGGG<br/> UUGAGAGGUGCCAGGCGCUCAGGAAGCCGAGCGCCACUACACCGUGGGCUCUCCCAUCGACUAGGAGGAGCA<br/> AACAAGCCUACUCCGGCGGCUACAACCCAGCCUAGCCAGGCGGCAAGUAGCAGAGUACGUGGAGGAGAACCAGACC<br/> AGGAACAAGCACAUAACCCCAACGAGUUGGGAAGGUGUACCCUCCAGCGUAGCAGGAGUUAAGUUCUUGUUGCUGUCC<br/> GGCCAUUCAAGGGCAACUACAAGGCCAGCUGACAGGCGUAACCAUAUCACCAACUGCAACGGCGCCGUGCUGUCCGUG<br/> GAGGAGCUCUGAUCGGCGGCGAGAUUAUCAAGGCCGACCCUAGCCUGGAGGAGGAGGAGGAAGUUAACAACCGC<br/> GAGAUACAACUCCGGCGCAGCUAUAACUCGAGCGUCCUUCUGCGGGCUGCCUUCUGGCGUUCUUCUCCUCC<br/> UUGCACCUGUACCCUUGGUCUUGAAUAAAGCCUGAGUAGGAAGGUCGAGGCGGCCAAACAACAAAAA<br/> AAAAAAAAAAAAAAAAAAAAAAAAAAAAAAAAAAAAAAAAAAAAAAAAAAAAAAAAAAAAAAAAAAAAAAAA<br/> AAAAAAAAAAAAAAAAAAAAAAAAAAAAAAAA</p> |
| <p>CD52 TALEN<br/>RIGHT arm</p> | <p>AUGGGCGAUCCUAAAAAGAAACGUAAGGUCAUCGAUAUCGCCGAUCUACGCACGCUCGGUCACAGCCAGCAGCAACAGGAG<br/> AAGAUCAAACCGAAGGUUCGUUCGACAGUGGGCGAGCACCAGGACACUGGUCGGCCACGGGUUUAACACACGCGCACAUC<br/> GUUGCUGUUAAGCCAACACCCGGCAGCGUUAAGGACCGUCGUGUCAAGUAUCAGGACAUGAUCGACGCGUUGCCAGAGGGCG<br/> ACACACGAAGCGAUCGUUGGCGUCGGCAACAGUGGUCGGCGCACGCGCUCUGGAGGCCUUGCUCACGGUGGGCGGAGAG<br/> UUGAGAGGUCCACCGUUAACAGUUGGACACAGGCCAACUUCUCAAGAUAUGCAAAACGUGGGCGGUGACCCGAGUGGAGCA<br/> GUGCAUGCAUGGCGCAAUGCAGUCAGCGGGUCCCGCUAACUUGACCCCGCAGCAGGUGGUGGCAUCGCCAGCAAUGGC<br/> GGUGGCAAGCAGGCGCUGGAGACGGUCCAGCGGCGUUGCCGGUGCUGUGCCAGGCCACGGCUUGACCCCGCAGCAGGUG<br/> GUGGCCAUCGCCAGCAAUAUUGGUGGCAAGCAGGCGCUGGAGACGGUCCAGCGGCGUUGCCGGUGCUGUGCCAGGCCAC<br/> GGCUUGACCCCGGAGCAGGUGGUGGCAUCGCCAGCCACGAUGGCGGCAAGCAGGCGCUGGAGACGGUCCAGCGGCGUUG<br/> CCGGUGCUGUGCCAGGCCACGGCUUGACCCCGCAGCAGGUGGUGGCAUCGCCAGCAAUUGGCGGUGGCAAGCAGGCGCUG<br/> GAGACGGUCCAGCGGCGUUGCCGGUGCUGUGCCAGGCCACGGCUUGACCCCGGAGCAGGUGGUGGCAUCGCCAGCCAC<br/> GAUGGCGGCAAGCAGGCGCUGGAGACGGUCCAGCGGCGUUGCCGGUGCUGUGCCAGGCCACGGCUUGACCCCGCAGCAG<br/> UUGGAGGCGCAUCGCCAGCAAUGGCGGUGGCAAGCAGGCGCUGGAGACGGUCCAGCGGCGUUGCCGGUGCUGUGCCAGGCC<br/> CACGGCUUGACCCCGCAGCAGGUGGUGGCAUCGCCAGCAAUUGGCGGUGGCAAGCAGGCGCUGGAGACGGUCCAGCGGCG<br/> UUGCCGGUGCUGUGCCAGGCCACGGCUUGACCCCGGAGCAGGUGGUGGCAUCGCCAGCAAUAUUGGUGGCAAGCAGGCG<br/> CUGGAGACGGUGCAGGCGCUGUUGCCGGUGCUGUGCCAGGCCACGGCUUGACCCCGGAGCAGGUGGUGGCAUCGCCAGC<br/> CACGAUGGCGGCAAGCAGGCGCUGGAGACGGUCCAGCGGCGUUGCCGGUGCUGUGCCAGGCCACGGCUUGACCCCGGAG<br/> CAGGUGGUGGCAUCGCCAGCCACGAUGGCGGCAAGCAGGCGCUGGAGACGGUCCAGCGGCGUUGCCGGUGCUGUGCCAG<br/> GCCACGGCUUGACCCCGCAGCAGGUGGUGGCAUCGCCAGCAAUUGGCGGUGGCAAGCAGGCGCUGGAGACGGUCCAGCGG<br/> CUGUUGCCGGUGCUGUGCCAGGCCACGGCUUGACCCCGCAGCAGGUGGUGGCAUCGCCAGCAAUAUUGGUGGCAAGCAG<br/> CGCUGGAGACGGUCCAGCGGCGUUGCCGGUGCUGUGCCAGGCCACGGCUUGACCCCGGAGCAGGUGGUGGCAUCGCC<br/> AGCAAUGGCGGUGGCAAGCAGGCGCUGGAGACGGUCCAGCGGCGUUGCCGGUGCUGUGCCAGGCCACGGCUUGACCCCG<br/> GAGCAGGUGGUGGCAUCGCCAGCAAUAUUGGUGGCAAGCAGGCGCUGGAGACGGUGCAGGCGCUGUUGCCGGUGCUGUGC</p>                                                                                                                                                                                                                                                                                                                                                                                                                                                                                                                                                                                                                                                                                                                                                                                                                                                                                                                                                                                                                                                                                                                                                                                                       |



|                                  |                                                                                                                                                                                                                                                                                                                                                                                                                                                                                                                                                                                                                                                                                                                                                                                                                                                                                                                                                                                                                                                                                                                                                                                                                                                                                                                                                                                                                                                                                                                                                                                                                                                                                                                                                                                                                                                                                                                                                                                                                                                                                                                                                                                                                                                                                                                                                                                                                                                                                                                                                                                                                                                                                                                                                                                                                                                                                                                                                                                                                                                                                                                                                                                                                                                                                |
|----------------------------------|--------------------------------------------------------------------------------------------------------------------------------------------------------------------------------------------------------------------------------------------------------------------------------------------------------------------------------------------------------------------------------------------------------------------------------------------------------------------------------------------------------------------------------------------------------------------------------------------------------------------------------------------------------------------------------------------------------------------------------------------------------------------------------------------------------------------------------------------------------------------------------------------------------------------------------------------------------------------------------------------------------------------------------------------------------------------------------------------------------------------------------------------------------------------------------------------------------------------------------------------------------------------------------------------------------------------------------------------------------------------------------------------------------------------------------------------------------------------------------------------------------------------------------------------------------------------------------------------------------------------------------------------------------------------------------------------------------------------------------------------------------------------------------------------------------------------------------------------------------------------------------------------------------------------------------------------------------------------------------------------------------------------------------------------------------------------------------------------------------------------------------------------------------------------------------------------------------------------------------------------------------------------------------------------------------------------------------------------------------------------------------------------------------------------------------------------------------------------------------------------------------------------------------------------------------------------------------------------------------------------------------------------------------------------------------------------------------------------------------------------------------------------------------------------------------------------------------------------------------------------------------------------------------------------------------------------------------------------------------------------------------------------------------------------------------------------------------------------------------------------------------------------------------------------------------------------------------------------------------------------------------------------------------|
|                                  | <p>CAGGCCACGGGCUUGACCCCGGAGCAGGUGGUGGCCAUCGCCAGCCACGAUUGGCGGCAAGCAGGCGUGGAGACGGUCCAG<br/> CGGCUGUUGCCGGUGUCUGGCCAGGCCACGGCUUGACCCUCAGCAGGUGGUGGCAUCGCCAGCAUUGGCGGCGGCGAGG<br/> CCGGCGUGGAGAGCAUUGUUGCCAGUUUUCUGCCUUGAUGCAGUAAAAGGGAUUGGGGAUCCUACAGCCGUUCCAGCUGGCC<br/> UUGGCCUCUGCCGGCGGUCUGCCUGGAGUAGCAUAAAAGGGAUUGGGGAUCCUACAGCCGUUCCAGCUGGCC<br/> AAGUCCGAGCUGGAGGAGAAGAAUCCGAGUUGAGGCACAAGCUGAAGUACUGUCCCCACGAGUACAUCGAGCUGAUCGAG<br/> AUCGCCCGAAGCAGCACCAGGACCGUAUCCUGGAGAUAGGUGAUGGAGUUCUUAUGAAGGUGUACGGCUACAGGGGCG<br/> AAGCACCUGGGCGGCUCCAGGAAGCCCGACGGCGCAUCUACACCGUGGGCUCUCCCAUCGACUACGGCGUAUCGUGGAC<br/> ACCAAGGCCUACUCCGGCGGCUACAACCCUGCCCAUCGGCCAGGCGGACGAAAUGCAGAGGUACGUGGAGGAGAACCAGACC<br/> AGGAACAAGCACAUAACCCCAACGAGUUGGUGAAGGUGUACCCUCCAGCGUGACCAGAUUAAGUUCUGUUGUCCGUG<br/> GGCCACUUAAGGGCAACUACAAGGCCAGCUGACCAGGCUAACCACAUCACCAACUGCAACGGCGCCGUGCUGUCCGUG<br/> GAGGAGCUCUGAUCGGCGGCGAGAUAUCAAGGCCCGCACCCUGACCUGGAGGAGGUGAGGAGGAAGUUAACAACGGC<br/> GAGAUAACUUCGCGGGCCAGUGAUAACUCGAGGCGUCCUUCUGCGGGGCUUGCCUUCUGGCCUUCUUCUCC<br/> UUGCACCUGUACCUCUUGGUCUUGAAUAAAGCCUGAGUAGGAAGGUCGAGGCGGCCAACAAACAAAAAAAAAAAAAAAA<br/> AAAAAAAAAAAAAAAAAAAAAAAAAAAAAAAAAAAAAAAAAAAAAAAAAAAAAAAAAAAAAAAAAAAAAAAAAAAAAAAA<br/> AAAAAAAAAAAAAAAAAAAAAAAAAAAAAAAA</p>                                                                                                                                                                                                                                                                                                                                                                                                                                                                                                                                                                                                                                                                                                                                                                                                                                                                                                                                                                                                                                                                                                                                                                                                                                                                                                                                                                                                                                                                                                                                                                                                                                                                                                                                                                                                                                                                                                                                                                                                             |
| <p>CD22 TALEN®<br/>LEFT arm</p>  | <p>AUGGGCGAUCCUAAAAAGAAACGUAAGGUCAUCGAUUCGCCGAUCUACGCACGUCGGCUACAGCCAGCAGCAACAGGAG<br/> AAGAUAACACCGAAGGUUCGUUCGACAGUGGCGCAGCACCAGAGGCACUGGUCGGCCACGGGUUUACACACGCGCACAUC<br/> GUUGCGUUAAGCCAACACCCGGCAGCGUUAAGGACCGUCGUGUCAAGUAUCAGGACAUGAUCGACGCGUUGCCAGAGGCG<br/> ACACACGAAGCGAUCGUUGGCGUGGCAACAGUUGGCCGCGCACGCGCUCUGGAGGCCUUGCUCACGGUGGCGGGAGAG<br/> UUGAGAGGUCCACCGUACAGUUGGACACAGCCAAUUCUUAAGAUUGCAAAAACGUGGCGGCGUGACCAGCGGCAAGCA<br/> GUGCAUGCAUGGCGCAAUGCAGCAGGGUGCCCGCUCAACUAGACCCCGGAGCAGGUGGUGGCCAUCGCCAGCCACGAU<br/> GGCGGCAAGCAGGCGCUGGAGACGGUCCAGCGGCGUUGCCGGUGCUGUCCAGGCCACGCGUUGACCCCGAGCAGGUG<br/> GUGGCCAUCGCCAGCAAUGGCGGUGGCAAGCAGGCGCUGGAGACGGUCCAGCGGCUUGCCGGUGCUGUCCAGGCCAC<br/> GGCUUGACCCCGCAGCAGGUGGUGGCAUCGCCAGCAAUUGGUGGCAAGCAGGCCGCGUGGCGUUGCCAGCGGCUUG<br/> CCGGUGCUGUCCAGGCCACGGCUAGACCCCGCAGCAGGUGGUGGCCAUCGCCAGCAAUAAUGGUGGCAAGCAGGCGCUG<br/> GAGACGGUCCAGCGGCGUUGCCGGUGCUGUCCAGGCCACGGCUUGACCCCGCAGCAGGUGGUGGCCAUCGCCAGCAAU<br/> GGCGGUGGCAAGCAGGCGCUGGAGACGGUCCAGCGGCGUUGCCGGUGCUGUCCAGGCCACGGCUUGACCCCGCAGCAG<br/> GUGGUGGCAUCGCCAGCAAUGGCGGUGGCAAGCAGGCGCUGGAGACGGUCCAGCGGCGUUGCCGGUGCUGUCCAG<br/> CACGGCUUGACCCCGCAGCAGGUGGUGGCAUCGCCAGCAAUUGGCGGUGGCAAGCAGGCGCUGGAGACGGUCCAGCGG<br/> UUGCCGGUGCUGUCCAGGCCACGGCUAGACCCCGCAGCAGGUGGUGGCCAUCGCCAGCAAUUGGCGGUGGCAAGCAGG<br/> CUGGAGACGGUCCAGCGGCGUUGCCGGUGCUGUCCAGGCCACGGCUUGACCCCGGAGCAGGUGGUGGCCAUCGCCAG<br/> CACGAUGGCGGCAAGCAGGCGCUGGAGACGGUCCAGCGGCGUUGCCGGUGCUGUCCAGGCCACGGCUUGACCCCG<br/> CAGGUGGUGGCAUCGCCAGCAAUGGCGGUGGCAAGCAGGCGCUGGAGACGGUCCAGCGGCGUUGCCGGUGCUGUCCAG<br/> GCCACGGCUUGACCCCGCAGCAGGUGGUGGCAUCGCCAGCAAUUGGCGGUGGCAAGCAGGCGCUGGAGACGGUCCAGCGG<br/> CUGUUGCCGGUGCUGUCCAGGCCACGGCUUGACCCCGGAGCAGGUGGUGGCCAUCGCCAGCCACGAUUGGCGGCAAGCAG<br/> CGCUGGAGACGGUCCAGCGGCGUUGCCGGUGCUGUCCAGGCCACGGCUUGACCCCGGAGCAGGUGGUGGCCAUCGCCAG<br/> AGCCACGAUGGCGGCAAGCAGGCGCUGGAGACGGUCCAGCGGCGUUGCCGGUGCUGUCCAGGCCACGGCUUGACCCCG<br/> GAGCAGGUGGUGGCCAUCGCCAGCAAUUGGUGGCAAGCAGGCGCUGGAGACGGUCCAGCGGCGUUGCCGGUGCUGUCC<br/> CAGGCCACGGCUUGACCCCGCAGCAGGUGGUGGCCAUCGCCAGCAAUAAUGGUGGCAAGCAGGCGCUGGAGACGGUCCAG<br/> CGCUGUUGCCGGUGCUGUCCAGGCCACGGCUUGACCCCGCAGCAGGUGGUGGCCAUCGCCAGCAAUUGGCGGUGGCAAG<br/> CCGGCGUGGAGAGCAUUGUUGCCAGUUUCUGCCUGAUCGCGGCGUUGCCGGUGGCAAGCAGCACCUCUGCGCC<br/> UUGGCCUGCCUGGCGGCGUCCUGCGCUGGAGUAGCAUAAAAGGGAUUGGGGAUCCUUAUCAGCCGUUCCAGCUGGUG<br/> AAGUCCGAGCUGGAGGAGAAGAAUCCGAGUUGAGGCACAAGCUGAAGUACUGUCCCCACGAGUACAUCGAGCUGAUCGAG<br/> AUCGCCCGAACAGCACCAGGACCGUAUCCUGGAGAUAGGUGAUGGAGUUCUUAUGAAGGUGUACGGCUACAGGGGCG<br/> AAGCACCGUGGCGGCUCCAGGAAGCCCGCAGCGCCAUUAACACCGUGGCUCCCCAUCGACUACCGGUGAUCGUGGAC<br/> ACCAAGGCCUACUCCGGCGGCUACAACCCUGCCCAUCGGCCAGGCGGACGAAAUGCAGAGGUACGUGGAGGAGAACCAGACC<br/> AGGAACAAGCACAUAACCCCAACGAGUUGGUGAAGGUGUACCCUCCAGCGUGACCAGAUUAAGUUCUGUUGUCCGUGUCC<br/> GGCCACUUAAGGGCAACUACAAGGCCAGCUGACCAGGCUAACCACAUCACCAUCGCAACGGCGCCGCGGUGCUGUCCGUG<br/> GAGGAGCUCUGAUCGGCGGCGAGAUAACUCGAGGCGUCCUUCUGCGGGGCUUGCCUUCUGGCAUCCCUUCUUCUCC<br/> GAGAUAACUUCGCGGCGGACUGAUAACUCGAGGCGUCCUUCUGCGGGGCUUGCCUUCUGGCAUCCCUUCUUCUCC<br/> UUGCACCUGUACCUCUUGGUCUUGAAUAAAGCCUGAGUAGGAAGGUCGAGGCGGCCAACAAACAAAAAAAAAAAAAAAA<br/> AAAAAAAAAAAAAAAAAAAAAAAAAAAAAAAAAAAAAAAAAAAAAAAAAAAAAAAAAAAAAAAAAAAAAAAAAAAAAAAA<br/> AAAAAAAAAAAAAAAAAAAAAAAAAAAAAAAA</p> |
| <p>CD22 TALEN®<br/>RIGHT arm</p> | <p>AUGGGCGAUCCUAAAAAGAAACGUAAGGUCAUCGAUUCGCCGAUCUACGCACGUCGGCUACAGCCAGCAGCAACAGGAG<br/> AAGAUAACACCGAAGGUUCGUUCGACAGUGGCGCAGCACCAGAGGCACUGGUCGGCCACGGGUUUACACACGCGCACAUC<br/> GUUGCGUUAAGCCAACACCCGGCAGCGUUAAGGACCGUCGUGUCAAGUAUCAGGACAUGAUCGACGCGUUGCCAGAGGCG<br/> ACACACGAAGCGAUCGUUGGCGUGGCAACAGUUGGCCGCGCACGCGCUCUGGAGGCCUUGCUCACGGUGGCGGAGAG<br/> UUGAGAGGUCCACCGUACAGUUGGACACAGGCCAAUUCUUAAGAUUGCAAAAACGUGGCGGCGUGACCAGCAGUGGAGGCA<br/> GUGCAUGCAUGGCGCAAUGCAGCAGGGUGCCCGCUCAACUAGACCCCGCAGCAGGUGGUGGCCAUCGCCAGCAAUUGG<br/> GGUGGCAAGCAGGCGCUGGAGACGGUCCAGCGGCGUUGCCGGUGCUGUCCAGGCCACGGCUUGACCCCGCAGCAGGUG<br/> GUGGCCAUCGCCAGCAAUGGCGGUGGCAAGCAGGCGCUGGAGACGGUCCAGCGGCGUUGCCGGUGCUGUCCAGGCCAC<br/> GGCUUGACCCCGCAGCAGGUGGUGGCCAUCGCCAGCAAUAAUGGUGGCAAGCAGGCGCUGGAGACGGUCCAGCGGCGUUG<br/> CCGGUGCUGUCCAGGCCACGGCUAGACCCCGGAGCAGGUGGUGGCCAUCGCCAGCAAUUAUGGUGGCAAGCAGGCGCUG<br/> GAGACGGUGCAGGCGCUGUUGCCGGUGCUGUCCAGGCCACGGCUUGACCCCGGAGCAGGUGGUGGCCAUCGCCAGCAAU<br/> AUUGGUGGCAAGCAGGCGCUGGAGACGGUCCAGGCGCUGUUGCCGGUGCUGUCCAGGCCACGGGCUUGACCCCGCAGCAG<br/> GUGGUGGCAUCGCCAGCAAUGGCGGUGGCAAGCAGGCGCUGGAGACGGUCCAGCGGCGUUGCCGGUGCUGUCCAGGCC<br/> CACGGCUUGACCCCGGAGCAGGUGGUGGCCAUCGCCAGCCAGAUUGGCGGCAAGCAGGCGCUGGAGACGGUCCAGCGGCG<br/> UUGCCGGUGCUGUCCAGGCCACGGCUUGACCCCGGAGCAGGUGGUGGCCAUCGCCAGCAAUUAUGGUGGCAAGCAGGCG<br/> CUGGAGACGGUCCAGGCGCUGUUGCCGGUGCUGUCCAGGCCACGGCUUGACCCCGGAGCAGGUGGUGGCCAUCGCCAGC<br/> CACGAUGGCGGCAAGCAGGCGCUGGAGACGGUCCAGCGGCGUUGCCGGUGCUGUCCAGGCCACGGCUUGACCCCGCAG<br/> CAGGUGGUGGCAUCGCCAGCAAUGGCGGUGGCAAGCAGGCGCUGGAGACGGUCCAGCGGCGUUGCCGGUGCUGUCCAG</p>                                                                                                                                                                                                                                                                                                                                                                                                                                                                                                                                                                                                                                                                                                                                                                                                                                                                                                                                                                                                                                                                                                                                                                                                                                                                                                                                                                                                                                                                                                                                                                                                                                                                                     |

|                                  |                                                                                                                                                                                                                                                                                                                                                                                                                                                                                                                                                                                                                                                                                                                                                                                                                                                                                                                                                                                                                                                                                                                                                                                                                                                                                                                                                                                                                                                                                                                                                                                                                                                                                                                                                                                                                                                                                                                                                                                                                                                                                                                                                                                                                                                                                                                                                                                                                                                                                                                                                                                                                                                                                                                                                                                                                                                                                                                                                                                                                                                                                                                                                                                                                                                                                           |
|----------------------------------|-------------------------------------------------------------------------------------------------------------------------------------------------------------------------------------------------------------------------------------------------------------------------------------------------------------------------------------------------------------------------------------------------------------------------------------------------------------------------------------------------------------------------------------------------------------------------------------------------------------------------------------------------------------------------------------------------------------------------------------------------------------------------------------------------------------------------------------------------------------------------------------------------------------------------------------------------------------------------------------------------------------------------------------------------------------------------------------------------------------------------------------------------------------------------------------------------------------------------------------------------------------------------------------------------------------------------------------------------------------------------------------------------------------------------------------------------------------------------------------------------------------------------------------------------------------------------------------------------------------------------------------------------------------------------------------------------------------------------------------------------------------------------------------------------------------------------------------------------------------------------------------------------------------------------------------------------------------------------------------------------------------------------------------------------------------------------------------------------------------------------------------------------------------------------------------------------------------------------------------------------------------------------------------------------------------------------------------------------------------------------------------------------------------------------------------------------------------------------------------------------------------------------------------------------------------------------------------------------------------------------------------------------------------------------------------------------------------------------------------------------------------------------------------------------------------------------------------------------------------------------------------------------------------------------------------------------------------------------------------------------------------------------------------------------------------------------------------------------------------------------------------------------------------------------------------------------------------------------------------------------------------------------------------------|
|                                  | <p>GCCACGGCUUAGACCCCCAGCAGGUGGUGGCCAUCGCCAGCAUAAUAGGUGGCAAGCAGGGCGUGGAGACGGUCCAGCGG<br/> CUGUUGCCGGUGCUGUCCAGGCCACGGCUUAGACCCCCAGCAGGUGGUGGCCAUCGCCAGCAUAGGCGGUGGCCAAGCAG<br/> CGCUGGAGACGGUCCAGCGGCUUUGCCGGUGCUGUCCAGGCCACGGCUUAGACCCCCAGCAGGUGGUGGCCAUCGCC<br/> AGCAUAAUAGGUGGCCAAGCAGCGCUGGAGACGGUCCAGCGGCUUUGCCGGUGCUGUCCAGGCCACGGCUUAGACCCCC<br/> CAGCAGGUGGUGGCCAUCGCCAGCAUAAUAGGUGGCAAGCAGGGCGCUGGAGACGGUCCAGCGGCUUUGCCGGUGCUGUCC<br/> CAGGCCACGGCUUAGACCCCCAGCAGGUGGUGGCCAUCGCCAGCAUAGGCGGUGGCCAAGCAGGGCGUGGAGACGGUCCAG<br/> CGGCUUUGCCGGUGCUGUCCAGGCCACGGCUUAGACCCCUAGCAGGUGGUGGCCAUCGCCAGCAUAGGCGGCGGCCAGC<br/> CCGGCGCUGGAGCAUUGUUGCCAGUUAUCUGCCCGUACUCCGGCGUUGCCCGCGUUGACCAACGACCCUUGCCGCGC<br/> UUGCCUGCCUGCGGGGCGUCCUGCGCUGGAUCGAGUAAAAGGGAUUGGGGAUCCUAUCAGCCGUUCCAGCUGGUG<br/> AAGUCCGAGCUGGAGGAGAAGAAUCCGAGUUGAGGCAACAUCGUAAGUACGUGCCCCACGAGUACAUAGCUGAUCGAG<br/> AUCGCCCGAACAGCACCAGGACCGUAUCCUGGAGAUAGGUGAUGGAGUUCUUAUGAAGGUGUACGGCUACAGGGGC<br/> AAGCACUUGGGCGCUCAGGAAGCCGACGGCCCAUCUACACCGUGGGCUCUCCCAUCGACUACGGCGUGAUCGUGGAC<br/> ACCAAGGCCUACUCCGGCGGCUACAACUGCCAUCCGGCCAGGCCGACGAAUAGCAGAGGUACGUGGAGGAGAACCAGACC<br/> AGGAACAAGCACAUAACCCCAACGAGUGGUGGAAGGUGUACCCUCCAGCGUGACCGAGUUAAGUUCUGUUCGUGUCC<br/> GGCCACUUAAGGGCAACUACAAGGCCACGUGACCAGGCUAACCACAUCACCAACUGCAACGGCGCCGUGCUGUCCGUG<br/> GAGGACUCCUGAUCGGCGGCGAGAGUAAGAAAGCCGCGUACCCUGGAGGAGGUGUACCCGAGGAGGUGGUGCCAGCGC<br/> GAGAUCAACUUCGGCGGCGACUGAUAACUGAGGCGCCUUCUGCGGGGCUUCCUUCUGGCCAUGCCUUCUUCUUCUCC<br/> UUGCACCGUACCUUUGGUCUUGAAUAAAGCCUGAGUAGGAAGGUCGAGGCGGCCAACAAACAAAAA<br/> AAAAAAAAAAAAAAAAAAAAAAAAAAAAAAAAAAAAAAAAAAAAAAAAAAAAAAAAAAAAAAAAAAAAAAAA<br/> AAAAAAAAAAAAAAAAAAAAAAAAAAAAAAAA</p>                                                                                                                                                                                                                                                                                                                                                                                                                                                                                                                                                                                                                                                                                                                                                                                                                                                                                                                                                                                                                                                                                                                                                                                                                                                                                                                                                                                                                                                                                                                                                                                                     |
| <p>CD20 TALEN®<br/>LEFT arm</p>  | <p>AUGGGCGAUCCUAAAAAGAAACGUAAGGUGAUCGAUUAUCGCCGAUCUACGCACGCUCGGCUACAGCCAGCAGCAACAGGAG<br/> AAGAUAACACCGAAGGUUCGUUCGACAGUGGCGCAGCACACGAGGACUGGUGCCACGGUUUACACACGCGCACAU<br/> GUUGCGUUAAGCAACACCCGGCAGCGUUAAGGACCGGUGCUGCAAGUAUCAGGACAUGAUCGACGCGUUGCCAGAGGCG<br/> ACACACGAAGCGAUCGUUGGCGUCCGCAACAGUUGCCGCGCACGCGCUCUGGAGGCCUUGGUGGCGGAGAG<br/> UUGAGAGGUCCACCGUUAACAGUUGGACACAGGCCAACUUCUCAAGAUAUGCAAAACGUGGCGGCGUGACCGCAGUGGAGGCA<br/> GUGCAUGCAUGGCGCAUAGCAGUGACGGGUGCCCGCUAAGUAGCCCCAGCAGGUGGUGGCCAUCGCCAGCAUAGGCG<br/> GGUGGCAAGCAGGGCGUGGAGACGGUCCAGCGGCUUUGCCGGUGCUGUCCAGGCCACGGCUUAGACCCCCAGCAGGUG<br/> GUGGCCAUCGCCAGCAUAGGCGGUGGCAAGCAGGCGUGGAGACGGUCCAGCGGCUUUGCCGGUGGUGGCCAGGCCAC<br/> GGCUUAGACCCCCAGCAGGUGGUGGCCAUCGCCAGCAUAAUAGGUGGCAAGCAGGGCGUGGAGACGGUCCAGCGGCUUUG<br/> CCGGUGCUGUGCCAGGCCACGGCUUAGACCCCGGAGCAGGUGGUGGCCAUCGCCAGCCACGAUAGGCGGCAAGCAGGGCGUG<br/> GAGACGGUCCAGCGGCUUUGCCGGUGCUGUCCAGGCCACGGCUUAGACCCCCAGCAGGUGGUGGCCAUCGCCAGCAU<br/> GGCGGUGGCAAGCAGGGCGUGGAGACGGUCCAGCGGCUUUGCCGGUGCUGUCCAGGCCACGGCUUAGACCCCCAGCAG<br/> GUGGUGGCCAUCGCCAGCAUAAUAGGUGGCAAGCAGGGCGUGGAGACGGUCCAGCGGCUUUGCCGGUGCUGUCCAGGCC<br/> CACGGCUUAGACCCCGGAGCAGGUGGUGGCCAUCGCCAGCCAGGAUGGCGGCAAGCAGGGCGUGGAGACGGUCCAGCGGCGUG<br/> UUGCCGGUGCUGUCCAGGCCACGGCUUAGACCCCGGAGCAGGUGGUGGCCAUCGCCAGCCACGAUAGGCGGCAAGCAGGGCG<br/> CUGGAGACCGUCCAGCGGCUUUGCCGGUGCUGUCCAGGCCACGGCUUAGACCCCGGAGCAGGUGGUGGCCAUCGCCAGCA<br/> AAUUAUAGGUGGCAAGCAGGGCGUGGAGACGGUCCAGCGGCUUUGCCGGUGCUGUCCAGGCCACGGCUUAGACCCCCAG<br/> CAGGUGGUGGCCAUCGCCAGCAUAGGCGGUGGCAAGCAGGGCGUGGAGACGGUCCAGCGGCUUUGCCGGUGCUGUCCAG<br/> GCCCACGGCUUAGACCCCCAGCAGGUGGUGGCCAUCGCCAGCAUAGGCGGUGGCAAGCAGGGCGUGGAGACGGUCCAGCGG<br/> GUUGCCGGUGCUGUCCAGGCCACGGCUUAGACCCCGGAGCAGGUGGUGGCCAUCGCCAGCAUAGGCGGUGGCAAGCAGGGCG<br/> GCGCUGGAGACGGUCCAGCGGCUUUGCCGGUGCUGUCCAGGCCACGGCUUAGACCCCGGAGCAGGUGGUGGCCAUCGCC<br/> AGCCACGAUAGGCGGCAAGCAGGGCGUGGAGACGGUCCAGCGGCUUUGCCGGUGCUGUCCAGGCCACGGCUUAGACCCCC<br/> CAGCAGGUGGUGGCCAUCGCCAGCAUAGGCGGUGGCAAGCAGGGCGUGGAGACGGUCCAGCGGCUUUGCCGGUGCUGUCC<br/> CAGGCCACGGCUUAGACCCCCAGCAGGUGGUGGCCAUCGCCAGCAUAAUAGGUGGCAAGCAGGGCGUGGAGACGGUCCAGCGG<br/> CGGCUUUGCCGGUGCUGUCCAGGCCACGGCUUAGACCCCGGAGCAGGUGGUGGCCAUCGCCAGCAUAGGCGGUGGCAAGCAGGGCG<br/> CCGGCGCUGGAGACAUUGUUGCCAGUUAUCUGCCCGUACUCCGGCGUUGCCCGUUGACCAACGACACCUCUGCGCC<br/> UUGCCUGCCUGCGGGGCGUCCUGCGCUGGAUCGAGUAAAAGGGAUUGGGGAUCCUAUCAGCCGUUCCAGCUGGUG<br/> AAGUCCGAGCUGGAGGAGAAGAAUCCGAGUUGAGGCAAGCUGAAGUACGUGCCACGAGUACAUAGCAGCUGAUCGAG<br/> AUCGCCGGAAACAGCACCCAGGACCGUAUCCUGGAGAUAGGUGGUAUGGAGUUCUUAUGAAGGUGUACGGCUACGGGG<br/> AAGCACUUGGGCGGCUCCAGGAAGCCGACGGCGCAUCUACACCGUGGGCUCUCCCAUCGACUACGGCGUGAUCGUGGAC<br/> ACCAAGGCCUACUCCGGCGGCUACAACUGCCAUCCGGCCAGGCCGACGAAUAGCAGAGGUACGUGGAGGAGAACCAGACC<br/> AGGAACAAGCACAUAACCCCAACGAGUGGUGGAAGGUGUACCCUCCAGCGUGACCGAGUUAAGUUCUGUUCGUGUCC<br/> GGCCACUUAAGGGCAACUACAAGGCCACGGCUGAACCACAUCACCAACUGUACCGUACCGGCGUCCGUGCUGCGUG<br/> GAGGAGCUCUGAUCGGCGGCGAGAUUAAGGCCCGCACCCUGACCCUGGAGGAGGUGAGGAGGAAGUUAACAACGGC<br/> GAGAUCAACUUCGGCGGCGACUGAUAACUGAGGCGUCCUUCUGCGGGGCUUGCCUUCUGGCCAUGCCUUCUUCUCC<br/> UUGCACCGUACCUUUGGUCUUGAAUAAAGCCUGAGUAGGAAGGUCGAGGCGGCCAACAAACAAAAA<br/> AAAAAAAAAAAAAAAAAAAAAAAAAAAAAAAAAAAAAAAAAAAAAAAAAAAAAAAAAAAAAAAAAAAAAAAA<br/> AAAAAAAAAAAAAAAAAAAAAAAAAAAAAAAA</p> |
| <p>CD20 TALEN®<br/>RIGHT arm</p> | <p>AUGGGCGAUCCUAAAAAGAAACGUAAGGUGAUCGAUUAUCGCCGAUCUACGCACGCUCGGCUACAGCCAGCAGCAACAGGAG<br/> AAGAUAACACCGAAGGUUCGUUCGACAGUGGCGCAGCACACGAGGACUGGUGCCACGGUUUACACACGCGCACAU<br/> GUUGCGUUAAGCAACACCCGGCAGCGUUAAGGACCGGUGCUGCAAGUAUCAGGACAUGAUCGACGCGUUGCCAGAGGCG<br/> ACACACGAAGCGAUCGUUGGCGUGGCAACAGUUGCCGCGCACGCGCUCUGGAGGCCUUGCUCACGGUGGCGGGAGAG<br/> UUGAGAGGUCCACCGUUAACAGUUGGACACAGGCCAACUUCUCAAGAUAUGCAAAACGUGGCGGCGUGACCGCAGUGGAGGCA<br/> GUGCAUGCAUGGCGCAUAGCAGUGACGGGUGCCCGCUAAGUAGCCCGGAGCAGGUGGUGGCCAUCGCCAGCAUAAU<br/> GGUGGCAAGCAGGGCGUGGAGACGGUCCAGCGGCUUUGCCGGUGCUGUCCAGGCCACGGCUUAGACCCCGCAGGUG<br/> GUGGCCAUCGCCAGCAUAGGCGGUGGCAAGCAGGGCGUGGAGACGGUCCAGCGGCUUUGCCGGUGCUGUCCAGGCCAC<br/> GGCUUAGACCCCCAGCAGGUGGUGGCCAUCGCCAGCAUAGGCGGUGGCAAGCAGGGCGUGGAGACGGUCCAGCGGCGUGU<br/> CCGGUGCUGUGCCAGGCCACGGCUUAGACCCCGGAGCAGGUGGUGGCCAUCGCCAGCAUAAUAGGUGGCAAGCAGGGCGUG<br/> GAGACGGUGCAGGGCGUGUUGCCGGUGCUGUCCAGGCCACGGCUUAGACCCCGGAGCAGGUGGUGGCCAUCGCCAGCAU<br/> AUUGGUGGCAAGCAGGGCGUGGAGACGGUCCAGCGGCUUUGCCGGUGCUGUCCAGGCCACGGCUUAGACCCCCAGCAG<br/> GUGGUGGCCAUCGCCAGCAUAAUAGGUGGCAAGCAGGGCGUGGAGACGGUCCAGCGGCUUUGCCGGUGCUGUCCAGGCC</p>                                                                                                                                                                                                                                                                                                                                                                                                                                                                                                                                                                                                                                                                                                                                                                                                                                                                                                                                                                                                                                                                                                                                                                                                                                                                                                                                                                                                                                                                                                                                                                                                                                                                                                                                                                                                                                                                                                                                                                                                                                                                                                                                            |



|                           |                                                                                                                                                                                                                                                                                                                                                                                                                                                                                                                                                                                                                                                                                                                                                                                                                                                                                                                                                                                                                                                                                                                                                                                                                                                                                                                                                                                                                                                                                                                                                                                                                                                                                                                                                                                                                                                                                                                                                                                                                                                                                                                                                                                                                                                                                                                                                                                                                                                                                                                                                                                                                                                                                                                                                                                                                                                                                                                                                                                                                                                                                                    |
|---------------------------|----------------------------------------------------------------------------------------------------------------------------------------------------------------------------------------------------------------------------------------------------------------------------------------------------------------------------------------------------------------------------------------------------------------------------------------------------------------------------------------------------------------------------------------------------------------------------------------------------------------------------------------------------------------------------------------------------------------------------------------------------------------------------------------------------------------------------------------------------------------------------------------------------------------------------------------------------------------------------------------------------------------------------------------------------------------------------------------------------------------------------------------------------------------------------------------------------------------------------------------------------------------------------------------------------------------------------------------------------------------------------------------------------------------------------------------------------------------------------------------------------------------------------------------------------------------------------------------------------------------------------------------------------------------------------------------------------------------------------------------------------------------------------------------------------------------------------------------------------------------------------------------------------------------------------------------------------------------------------------------------------------------------------------------------------------------------------------------------------------------------------------------------------------------------------------------------------------------------------------------------------------------------------------------------------------------------------------------------------------------------------------------------------------------------------------------------------------------------------------------------------------------------------------------------------------------------------------------------------------------------------------------------------------------------------------------------------------------------------------------------------------------------------------------------------------------------------------------------------------------------------------------------------------------------------------------------------------------------------------------------------------------------------------------------------------------------------------------------------|
|                           | <p>ATGCACATGGGTGAGACAGGCTCCCGGAAAGGGCCTGGAGTGGGTCTCTACCATCAGTGGAAATCCGGGTCTATTGGATAT<br/> GCCGACAGCGTGAAAGGCCGCTTCACAATCTCTCGAGATAACGCTAAGAAAAGTCTGTACCTGCAGATGAATTCACCTGAGG<br/> CGAGAGGACACTGCCCTGTACTATTGGCCAAAGGATATTCAGTACGGCAACTACTATTACGGGATGGACGTCTGGGGCGAG<br/> GGAACCCAGTACCGCTCAGCTCCGGGAGGAGGATCCCGGAGGAGGAGGAAGCGGAGGAGGATCCGAGATCGTGCTG<br/> ACACAGAGCCAGCCACTCTGAGTCTGTACCCGGCGAACGAGCTACACTGTCTGTGGGCAAGCCAGTCCGCTCTCTAGT<br/> TATCTGGCTTGGTACCAGCAGAAGCCAGGACAGCCACGACTGTGATCTACGATGCTAGCAACAGAGCAACAGGGATT<br/> CCTGCAAGTTCTTGGCAGTGGGTGAGGAACTGACTTTACACTGACTATCTCAAGCCTGGAGCCTGAAGATTTCCGCCGTG<br/> TATTACTGCCAGCAGCGGTCCAATTGGCCAATCACCTTTGGCCAGGGGACACGCCTGGAGATCAAGACTACCACACCTGCT<br/> CCAGGACCACTACTCCAGCCTACCATTGCTTCTCAGCCCTGAGTCTGGCCCTGAAGCATGTAGACCAGCAGCAGGA<br/> GGAGCAGTGCATACCAGAGGACTGGACTTTGCTGCGATATCTATATTTGGGCACCCTGGCTGGAATTTGGGAGTGTG<br/> CTGTGCTCTGGTCAATCACCTGTATTGCAAGCGAGGCCGGAAGAACTGCTGTACATTTTCAACAGCCTTTTATGAGA<br/> CCAGTGCAGACTACCAGGAGGAAGACGGCTGCAGCTGTAGTTCCCGGAGGAAGGAAGGGGATGTGAGCTGAGGGTC<br/> AAGTTTAGCCGCTCCGCTGATGCACCTGCCTATCAGCAGGGGCGAATCAGCTGTACAACGAGCTGAATCTGGGACGGAGA<br/> GAGGAATACGAGCTGTGGATAAAAGGCCGAGGACGAGATCCAGAAATGGGAGGGGAAGCCCCGACGGAAAAACCTCAGGAG<br/> GGCCTGTATAATGAACTGCAGAAGGACAAAATGGCTGAGGCATACTCTGAAATCGGAATGAAGGGCGAGAGAAGGCCGCGA<br/> AAAGGCCACGATGGGCTGTATCAGGGACTGAGTACCACCAGCAAGGACACCTACGATGCATGACAGCCAGCCGCA<br/> CCCCGAGGAGCGGAGCTACTAATTCAGCCTGCTGAAGCAGGCTGGAGACGTGGAGGAGAACCCTGGACCTATGGCTCTG<br/> CCCGTCAACCGCTCTGTGCTGCCACTGGCCCTGCTGCTGCACGCGAGCAAGACCAAGGTGCAGCTGCAGCAGAGCGGCCCT<br/> GGCCTGGTGAAGCCAAGCCAGACACTGTCCCTGACCTGCGCCATCAGCGCGGATCCGCTGAGCTCAACTCCGCCCGCTGG<br/> AATTGGATCAGGCAGTCCCCTTCTCGGGCCTGGAGTGGCTGGGAAGGACATACTATCGGTGATCAACAGCTTAT<br/> GCCGTGTCTGTGAAGAGCAGAATCACAATCAACCCTGACACCTCCAAGATCAGTTCTCTCTGCAGCTGAATAGCGTGACA<br/> CCAGAGGACACCCGCTGTACTATTGGCCAGGGAGGTGACCGGCGACCTGGAGGATGCCTTTGACATCTGGGGCCAGGGC<br/> ACAATGGTGACCGTGTCTAGCGGAGGAGGAGGATCCGGAGGAGGAGGATCTGGCGGCGGCGGACGATATCCAGATGACA<br/> CAGTCCCATCCTCTCTGAGCCCTCCGTGGGCGACAGAGTACAATCACCTGTAGGGCCTCCAGACCATCTGGCTTAC<br/> CTGAATGGTATCAGCAGAGGCCCGGCAAGGCCCTAATCTGCTGATCTACGACGCAAGCTCCCTGCAGAGCGGAGTGCCA<br/> TCCAGATCTCTGGCAGGGGCTCCGGCAGACTTCAACCTGACCTCTAGCCTGCAGGCGGAGGACTTCGCCACCTAC<br/> TATTGCCAGCAGTCTTATAGCATCCCCAGACATTTGGCCAGGGCACAAGCTGGAGATCAAGACCACAACCCAGCACCA<br/> AGGCCACTACACTGCACCAACCTATCGCCTCTCAGCCCTGAGCCTGAGACCTGAGGCATGTAGGCCAGCAGGAGGA<br/> GCAGTCCATACAAGGGGTCTGGATTTTGCATGCGACATCTACATCTGGGCACCTCTGGCAGGAACATGTGGCGTCTCTG<br/> CTCAGCCTGGTCACTACCCTGTACTGCAAGAGAGGCAGGAAGAAGCTGCTGTATATCTTCAAGCAGCCCTTATGCCCCCC<br/> GTGCAGACAACCCAGGAGGAGGATGGCTGCTCTGTAGGTTCCAGAAAGAGGAGGAGGAGGATGTGAGCTGCGGTGAAG<br/> TTTTCCCGTCTGCCGACGCACTGCATACCAGCAGGGCCAGAACCCAGCTGTATAACGAGCTGAATCTGGGCCGGAGAGAG<br/> GAGTACGATGTGCTGGACAAGAGGGCGGCGCAGAGATCCAGAGATGGGGCGCAAGCCCCGGAGAAAGAACCCCTCAGGAGGGC<br/> CTGTACAATGAGCTGCAGAAGGATAAGATGGCCGAGGCTTATCTGAGATCGGCATGAAGGGAGAGAGGGCGCGGGGCAAG<br/> GGACACGACGGACTGTACCAGGGACTGAGCAGGCCACCAAGGATACCTATGACGCCCTGCATATGCAGGCACTGCCTCCA<br/> AGGTGA</p> |
| <p>CD22.CD20<br/> CAR</p> | <p>SP CD22scFV-CD8h/tm-41BB-CD3z-P2A-SP-CD20scFV-CD8h/tm-41BB-CD3z<br/> ATGGCTCTGCCGCTCACCGCTCTGCTGCTGCCACTGGCCCTGCTGCTGCACGCGAGCAAGACCAAGGTGCAGCTGCAGCAG<br/> AGCGGCCCTGGCTGGTGAAGCCAAGCCAGACACTGTCCCTGACCTGCGCCATCAGCGGCGATTCCGTGAGCTCAACTCC<br/> CGCCCTGGAATTTGGATCAGGCGAGTCCCCTTCTCGGGCCTGGAGTGGCTGGGAAGGACATACTATCGGTCTAAGTGGTAC<br/> AACGATTATGCGGTGTCTGTGAAGAGCAGAATCACAATCAACCCTGACACCTCCAAGAATCAGTTCTCTCTGCAGCTGAAT<br/> AGCGTGACACCAGAGGACACCGCCGTGACTATTGGCCAGGGAGGTGACCGGCGACCTGGAGGATGCCTTTGACATCTGG<br/> GGCCAGGGCACAATGGTGAACCTGTCTAGCGGAGGAGGAGGATCCGGAGGAGGAGGATCTGGCGGCGGCGGACGCGATATC<br/> CAGATGCACAGTCCCCTCCTCTGAGCGCCTCCGTGGGCGACAGAGTGACAATCACCTGTAGGGCCTCCAGACCATCTGGCTTAC<br/> TGCTTACCTGAAGTGTATCAGCAGAGGCCCGGCAAGGCCCTAATCTGCTGATCTACGACGCAAGCTCCCTGCAGAGC<br/> GGAGTGCCATCCAGATTTCTTGGCAGGGGCTCCGGCAGAGACTTCAACCTGACCTCTAGCCTGCAGGCGGAGGACTTC<br/> GCCACCTACTATTGCCAGCAGTCTTATAGCATCCCCAGACATTTGGCCAGGGCACAAGCTGGAGATCAAGACCACAAC<br/> CCAGCCAAAGGCCACTACACTGCACCAACCTATCGCCTCTCAGCCCTGAGCCTGAGACCTGAGGCATGTAGGCCAGCA<br/> GCAGGAGGAGCAGTCCATACAAGGGGTCTGGATTTTGCATGCGACATCTACATCTGGGCACCTCTGGCAGGAACATGTGGC<br/> GTGCTCTGCTCAGCCTGGTCACTACCCTGTACTGCAAGAGAGGCAGGAAGAAGCTGCTGTATATCTTCAAGCAGCCCTTC<br/> ATGCGCCCCGTGCAGACAACCCAGGAGGAGGATGGCTGCTCTGTAGGTTCCAGAAAGAGGAGGAGGAGGATGTGAGCTG<br/> CGCGTGAAGTTTTCCCGTCTGCCGACGCACTGCATACCAGCAGGGCCAGAACCCAGCTGTATAACGAGCTGAATCTGGGCC<br/> CGGAGAGAGGAGTACGATGTGCTGGACAAGAGGGCGGCGCAGAGATCCAGAGATGGGGCGCAAGCCCCGGAGAAAGAACCCCT<br/> CAGGAGGGCCTGTACAATGAGGTGCAGAAGGATAAGATGGCCGAGGCTTATCTGAGATCGGCATGAAGGGAGAGAGGGCGC<br/> CGGGCAAGGGACACGACGACTGTACCAGGGACTGAGCACAGCCACCAAGGATACCTATGACGCCCTGCATATGCAGGCA<br/> CTGCCCTCAAGGGGAAGCGGAGCTACTAACTTCAGCCTGCTGAAGCAGGCTGGAGACGTGGAGAGAACCCCTGGACCTATG<br/> GCTCTGCCCTGTCACCGCTCTGCTGCTGCCCTGGCTCTGCTGCTGCACGCGCAGCCCGGAAAGTCCAGCTGGTCAATCT<br/> GGGGCGGGCTGGTGCAGCCAGGAAGATCACTGAGGCTGAGCTGCGCGCTCCCGCTTCACTTCAACGACTATGCCATG<br/> CACTGGGTGAGACAGGCTCCCGGAAAGGGCCTGGAGTGGGTCTCTACCATCAGTTGGAATCCGGGTCTATTGGATATGCC<br/> GACAGCGTGAAGGCCGCTTCACAATCTCTCGAGATAACCGTAAAGAAAAGTCTGTACTGTACGACAGCAACAGGATCTGAGGCA<br/> GAGGACACTGCCCTGTACTATTGGCCAAAGGATATTCAGTACGGCAACTACTATTACGGGATGGACGTCTGGGGCGAGGGA<br/> ACCACAGTACCGCTCAGCTCCGGAGGAGGAGGATCCGGAGGAGGAGGAAGCGGAGGAGGAGGATCCGAGATCGTGTGACA<br/> CAGAGCCAGCCACTCTGAGTCTGTACCCGGCGAACAGAGCTACACTGTCTGTGGGCAAGCCAGTCCGCTCTAGTTAT<br/> CTGGCTTACCAGCAGAAGCCAGGACAGGCAACGACTGTGATCTACGATGCTAGCAACAGCAACAGGAACTCCCT<br/> GCAAGGTTCTTGGCAGTGGGTGAGAACTGACTTTACACTGACTATCTCAAGCCTGGAGCCTGAAGATTTCCGCCGTGTAT<br/> TACTGCCAGCAGCGGTCCAATTGGCCAATCACCTTTGGCCAGGGGACACGCCTGGAGATCAAGACTACCACACTGTCTCCA<br/> CGACACCTACTCCAGCCTACCATTGCTTCTCAGCCCTGAGTCTGGCCCTGAAGCATGTAGACCAGCAGCAGGAGGA<br/> GCAGTGCATACCAGAGGACTGGACTTTGCTGCGATATCTATATTTGGGCACCCTGGCTGGAACCTGTGGAGTCTGCTG<br/> CTGTCTCTGGTCACTACCCTGTATTGCAAGCGAGGCCGGAAGAACTGCTGTACATTTTCAACAGCCTTTTATGAGACCA<br/> GTGCAGACTACCAGGAGGAAGACGGCTGCAGCTGTAGGTTCCCGGAGGAAGGAAGGGGATGTGAGCTGAGGGTCAAG</p>                                                                                      |

|                      |                                                                                                                                                                                                                                                                                                                                                                                                                                                                                                                                                         |
|----------------------|---------------------------------------------------------------------------------------------------------------------------------------------------------------------------------------------------------------------------------------------------------------------------------------------------------------------------------------------------------------------------------------------------------------------------------------------------------------------------------------------------------------------------------------------------------|
|                      | TTTAGCCGCTCCGCTGATGCACCTGCCTATCAGCAGGGGCAGAATCAGCTGTACAACGAGCTGAATCTGGGACGGAGAGAG<br>GAATACGACGTGCTGGATAAAAAGGCGAGGACGAGATCCAGAAATGGGAGGGGAGCCCCGACGGAAAAACCCCTCAGGAGGGC<br>CTGTATAATGAACTGCAGAAGGACAAAATGGCTGAGGCATACTCTGAAATCGGAATGAAGGCGGAGAGAAGGCGCGGAAAA<br>GGCCACGATGGGCTGTATCAGGGACTGAGTACCGCCACAAAGGACACCTACGATGCACCTGCATATGCAGGCCCTGCCACCC<br>CGGTGA                                                                                                                                                                                           |
| NanoLuc_T2A<br>_EGFP | GGAGAAGTCGACGCCACCATGGTCFTLEDFVGDWRQTAGYNLDQVLEQGGVSSLFQNLGVSVTPIQIRIVLSGENGLKIDIH<br>VIIPYEGLSGDQMGOIEKIFKVVYPVDDHFFKVLHYGTLVIDGVTNPMIDYFGRPYEGIAVFDGKKITVTGTLWNGNKII<br>DERLINPDGSLFRVTINGVTGWRLCERILAGAGCCGAGGGCAGAGGCAGCCTGCTGACCTGCGGGCAGCTGGAGGAGAA<br>CCCCGGGCCCATGGTGVSKGEEELFTGVVPIVELDGDVNGHKFSVSGEGEDATYGKLTLLKFICTTKGLPVPWPTLVTTLT<br>YGVQCFSTRYPDHMKQHDFFKSAMPEGYVQERTIFFKDDGNYKTRAEVKFEQDTLVNRIELKGI DFKEDGNILGHKLEYNYN<br>SHNVYIMADKQKNGIKVNFKIRHNIEDGSVQLADHYQQNTPIGDGPVLLPDNHYLSTQSALSKDPNEKRDMVLLFEVTA<br>GITLGMDELYKTGAGGCGGCCCTCGAC |

**Supplementary Table S2.** Antibodies used in this study.

| <b>Exhaustion</b>                |                     |                                         |             |
|----------------------------------|---------------------|-----------------------------------------|-------------|
| <b>Antigen</b>                   | <b>Fluorochrome</b> | <b>Company</b>                          | <b>RRID</b> |
| PD-1                             | BV421               | BioLegend (329920)                      | AB_10960742 |
| LAG-3                            | PerCP-eFluor710     | eBioscience (46-2239-42)                | AB_2573732  |
| TIM-3                            | APC                 | BioLegend (345012)                      | AB_2561718  |
| CD4                              | PE-Vio770           | Miltenyi Biotec (130-113-227)           | AB_2726038  |
| CD8                              | BV510               | BD Bioscience (563919)                  | AB_2722546  |
| Viability                        | e780                | Invitrogen (65086514)                   |             |
| <b>Differentiation</b>           |                     |                                         |             |
| <b>Antigen</b>                   | <b>Fluorochrome</b> | <b>Company</b>                          |             |
| CD45RA                           | APCCy7              | Miltenyi Biotec (130-113-363)           | AB_2726133  |
| CD62L                            | PE                  | Miltenyi Biotec (130-113-625)           | AB_2733829  |
| CD4                              | PE-Vio770           | Miltenyi Biotec (130-113-227)           | AB_2726038  |
| CD8                              | BV510               | BD Bioscience (563919)                  | AB_2722546  |
| Viability                        | e780                | Invitrogen (65086514)                   |             |
| <b>Dual CAR staining</b>         |                     |                                         |             |
| CD22 Protein                     | Cy3 (secondary)     | Lakepharma (custom made)                |             |
| CD20 Protein- His                | APC (secondary)     | AcroBiosystems (CD0-H52H3)              |             |
| Anti-His                         | APC                 | BioLegend (362605)                      | AB_2715818  |
| Anti-Fcgamma                     | Cy3                 | Jackson ImmunoResearch<br>(115-165-205) | AB_2338694  |
| CD4                              | APC-Vio770          | Miltenyi Biotec (130-113-211)           | AB_2726022  |
| CD8                              | VB510               | BD Bioscience (563919)                  | AB_2722546  |
| <b>Serial Killing staining 1</b> |                     |                                         |             |
| CD22-Fc                          | Cy3 (secondary)     | Lakepharma (custom made)                |             |
| CD20 Protein- His                | APC (secondary)     | AcroBiosystems                          |             |
| Anti-His                         | APC                 | BioLegend (362605)                      | AB_2715818  |
| Anti-Fcgamma                     | Cy3                 | Jackson ImmunoResearch<br>(115-165-205) | AB_2338694  |

|                                                            |                     |                               |            |
|------------------------------------------------------------|---------------------|-------------------------------|------------|
| <b>CD4</b>                                                 | FITC                | Miltenyi Biotec (130-114-585) | AB_2726703 |
| <b>CD8</b>                                                 | VB510               | BD Bioscience (563919)        | AB_2722546 |
| <b>CD19</b>                                                | PeCy7               | Miltenyi Biotec (130-113-170) | AB_2733209 |
| <b>Viability</b>                                           | e780                | Invitrogen (65086514)         |            |
| <b>Serial Killing staining 1 (Differentiation profile)</b> |                     |                               |            |
| <b>CD22-Fc-AF647</b>                                       | AF647               |                               |            |
| <b>PD-1</b>                                                | VB510               | BD Bioscience (563076)        | AB_2737990 |
| <b>CD45RA</b>                                              | APCCy7              | Miltenyi Biotec (130-113-363) | AB_2726133 |
| <b>CD62L</b>                                               | PE                  | Miltenyi Biotec (130-113-625) | AB_2733829 |
| <b>CD4</b>                                                 | PE-Vio770           | Miltenyi Biotec (130-113-227) | AB_2726038 |
| <b>CD19</b>                                                | FITC                | Miltenyi Biotec (130-091-328) | AB_244222  |
| <b>CD5</b>                                                 | AF700               | Biolegend (364025)            | AB_256625  |
| <b>CD8</b>                                                 | VioBlue             | Miltenyi Biotec (130-110-683) | AB_2659239 |
| <b>Bone marrow analysis</b>                                |                     |                               |            |
| <b>Antigen</b>                                             | <b>Fluorochrome</b> | <b>Company</b>                |            |
| <b>CD45</b>                                                | PE                  | Miltenyi (130-110-632)        | AB_2658239 |
| <b>mCD45</b>                                               | BV-421              | BD Biosciences (560501)       | AB_1645275 |
| <b>CD5</b>                                                 | AlexaFluor-700      | BioLegend (300632)            | AB_2632671 |
| <b>CD8</b>                                                 | VB510               | BD Bioscience (563919)        | AB_2722546 |
| <b>CD4</b>                                                 | PerCP-Vio-770       | Miltenyi Biotec (130-113-228) | AB_2726039 |
| <b>CD19</b>                                                | PE-Vio700           | Miltenyi Biotec (130-113-170) | AB_2733209 |
| <b>CD22 Fc</b>                                             | AlexFluor-647       | LakePharma (custom)           |            |
| <b>B-NHL samples</b>                                       |                     |                               |            |
| <b>CD45</b>                                                | APC                 | BD Bioscience (555485)        | AB_398600  |
| <b>CD20</b>                                                | BV421               | BD Bioscience (562873)        | AB_2737857 |
| <b>CD22</b>                                                | PE                  | BioLegend (363504)            | AB_2564610 |
| <b>CD3</b>                                                 | PeCy7               | BD Bioscience (563423)        | AB_2738196 |
| <b>CD56</b>                                                | PeCy7               | BD Bioscience (557747)        | AB_396853  |
| <b>CD33</b>                                                | PeCy7               | BD Bioscience (333952)        | AB_333952  |
| <b>Tumor cell lines characterization/Qifit a</b>           |                     |                               |            |
| <b>CD22</b>                                                | PE                  | Biolegend (363504)            | AB_2564610 |
| <b>CD22</b>                                                | Biotin              | Biolegend (363510)            | AB_2564615 |
| <b>CD20</b>                                                | APC                 | Biolegend (302310)            | AB_314258  |
| <b>CD20</b>                                                | Biotin              | Biolegend (302350)            | AB_2565524 |

**Supplementary Table S3**

| Sample number | Diagnostic | Tissue      | Viability after thawing % | % B-cell lineage | % CD22 <sup>+</sup> | % CD20 <sup>+</sup> | % CD20 <sup>+</sup> CD22 <sup>+</sup> |
|---------------|------------|-------------|---------------------------|------------------|---------------------|---------------------|---------------------------------------|
| 1             | MCL        | bone marrow | 93.9                      | 69.8             | 98                  | 93.3                | 92.8                                  |
| 2             | MCL        | lymph node  | 91.2                      | 79.3             | 99.6                | 99.5                | 96.3                                  |
| 3             | MZL        | lymph node  | 64.3                      | 55.8             | 91.2                | 97.6                | 96.4                                  |
| 4             | FL         | lymph node  | 90.7                      | 79.9             | 99.8                | 99.4                | 98.8                                  |
| 5             | MCL        | bone marrow | 55.9                      | 10.5             | 53.5                | 8.17                | 8                                     |
| 6             | MCL        | Bone marrow | 63                        | 7.61             | 16.8                | 0.025               | 0                                     |
| 7             | MZL        | lymph node  | 72.9                      | 21.9             | 91.2                | 93.6                | 88.6                                  |
| 8             | DLBCL      | lymph node  | 82.3                      | 34.4             | 83.8                | 77.1                | 72.1                                  |
| 9             | BL         | bone marrow | 96.7                      | 75.4             | 6.46                | 91.3                | 6.2                                   |
| 10            | DLBCL      | lymph node  | 64.4                      | 13.2             | 78.5                | 86.8                | 73.3                                  |
| 11            | BL (like)  | lymph node  | 64.8                      | 78.8             | 62.7                | 99.4                | 64.1                                  |
| 12            | MZL        | lymph node  | 83.5                      | 81.5             | 82.8                | 98.9                | 81.3                                  |
| 13            | DLBCL      | lymph node  | 81.7                      | 63.3             | 73.3                | 96.5                | 72.1                                  |
| 14            | FL         | lymph node  | 90.4                      | 72.1             | 71                  | 32.5                | 27                                    |
| 15            | MCL        | lymph node  | 90.9                      | 76.6             | 0.43                | 91.9                | 0.34                                  |
| 24            | FL > DLBCL | bone marrow | 55.8                      | 13.1             | 52.9                | 57.5                | 52.8                                  |
| 26            | BL         | bone marrow | 78.8                      | 61               | 3.94                | 92.3                | 3.94                                  |
| 30            | DLBCL      | lymph node  | 71.2                      | 87.6             | 17.6                | 74.7                | 29.8                                  |
| 32            | FL         | lymph node  | 75.3                      | 77.8             | 80.6                | 97.3                | 85.8                                  |
| 33            | FL         | lymph node  | 72.7                      | 76.3             | 3.21                | 55.1                | 3.33                                  |
| 42            | FL         | lymph node  | 81.6                      | 71.4             | 61.8                | 99.1                | 70.4                                  |

**Abbreviations:** MCL: Mantle Cell Lymphoma; MZL: Marginal Zone Lymphoma; DLBCL: Diffuse Large B-cell Lymphoma; FL: Follicular Lymphoma; BL; Burkitt Lymphoma

Supplementary Table S4

| <b>Feature</b>                      | <b>Allogeneic</b>                                                                                                                                           | <b>Autologous</b>                                                                                                                                                                                                                  |
|-------------------------------------|-------------------------------------------------------------------------------------------------------------------------------------------------------------|------------------------------------------------------------------------------------------------------------------------------------------------------------------------------------------------------------------------------------|
| <b>Cell source</b>                  | Healthy donor                                                                                                                                               | Individual patient derived                                                                                                                                                                                                         |
| <b>Time to infusion</b>             | Readily available after treatment decision.                                                                                                                 | Intermediate to long (3 weeks to months)                                                                                                                                                                                           |
| <b>Manufacturing considerations</b> | Scaled up batch manufacturing, possibility of automation and implementation of standardized controls to ensure efficacy, safety and T-cell characteristics. | High process variability due to patient-individualized manufacturing.<br>Low number of available lymphocytes due to disease or previous treatments.<br>Complicated logistics.<br>Limited in regions lacking modern infrastructure. |
| <b>T-cell characteristics</b>       | Higher inter-patient product homogeneity. Enhanced T-cell fitness and starting material composition.                                                        | Reduced T-cell fitness due to previous treatments or disease burden.                                                                                                                                                               |
| <b>Potential adverse events</b>     | Graft-vs-host disease, cytokine release syndrome, genomic alterations due to CAR integration/gene editing, neurologic toxicities.                           | Cytokine release syndrome, genomic alterations due to CAR integration, B-cell aplasia, neurologic toxicities.                                                                                                                      |
| <b>Durability</b>                   | Short to Intermediate (days to months).                                                                                                                     | Intermediate to long (months to >10 years).                                                                                                                                                                                        |
| <b>Redosing potential</b>           | Possible in the absence of donor specific anti-HLA antibodies.                                                                                              | Can be limited by the number of patient-specific lymphocytes collected.                                                                                                                                                            |



**Supplementary Figure S1**

**Current landscape CAR-T clinical trials in B-cell lymphoma**

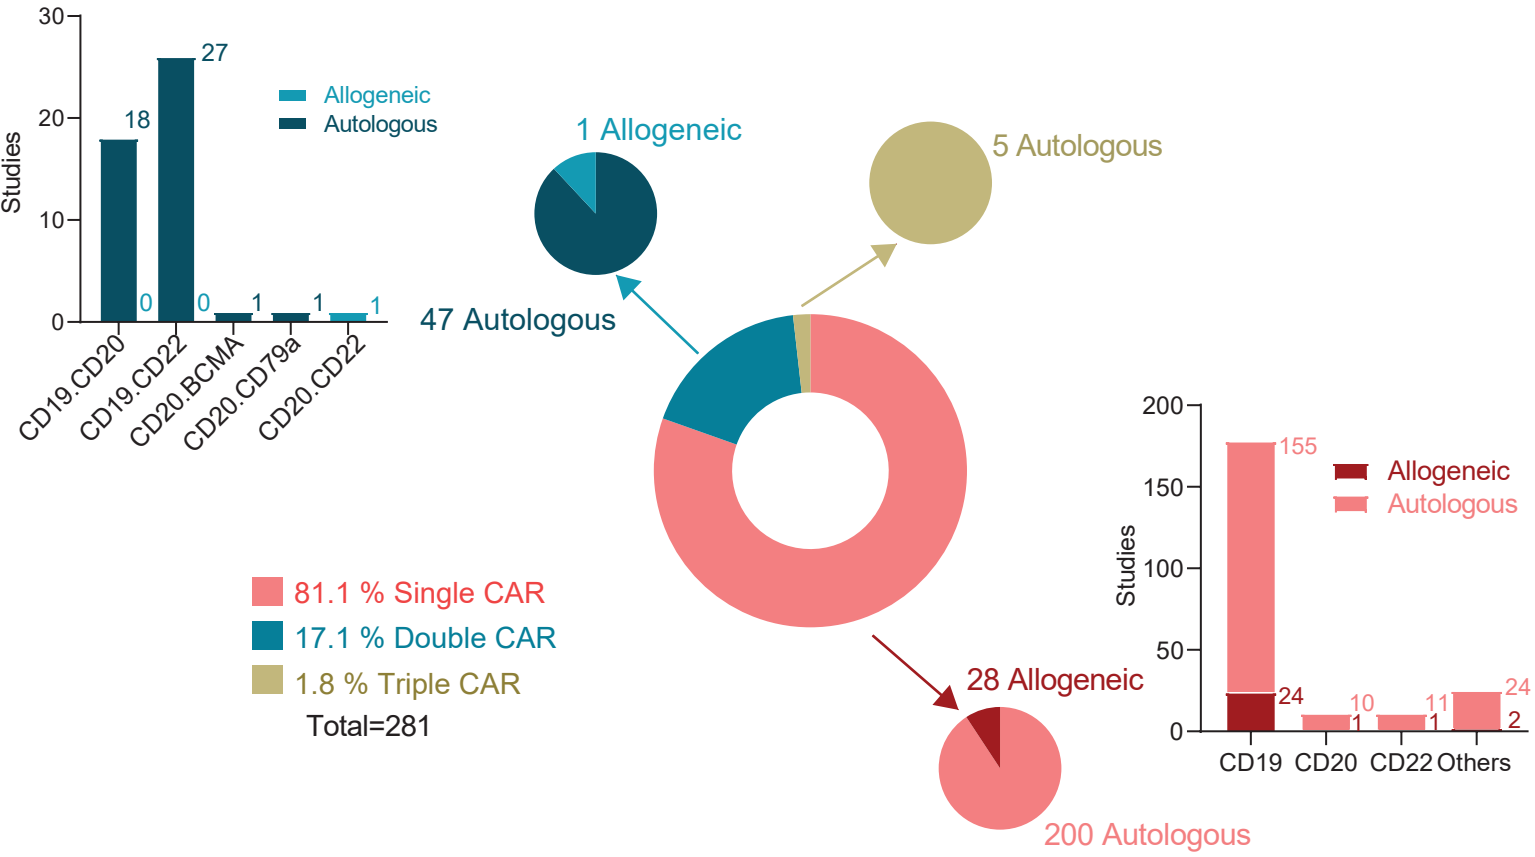

# Supplementary Figure S2

**A**

CD20-His protein

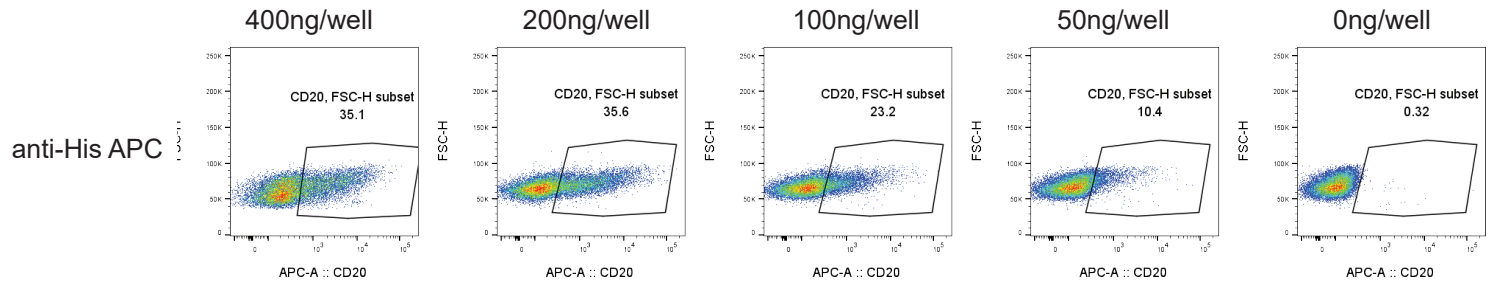

# Supplementary Figure S3

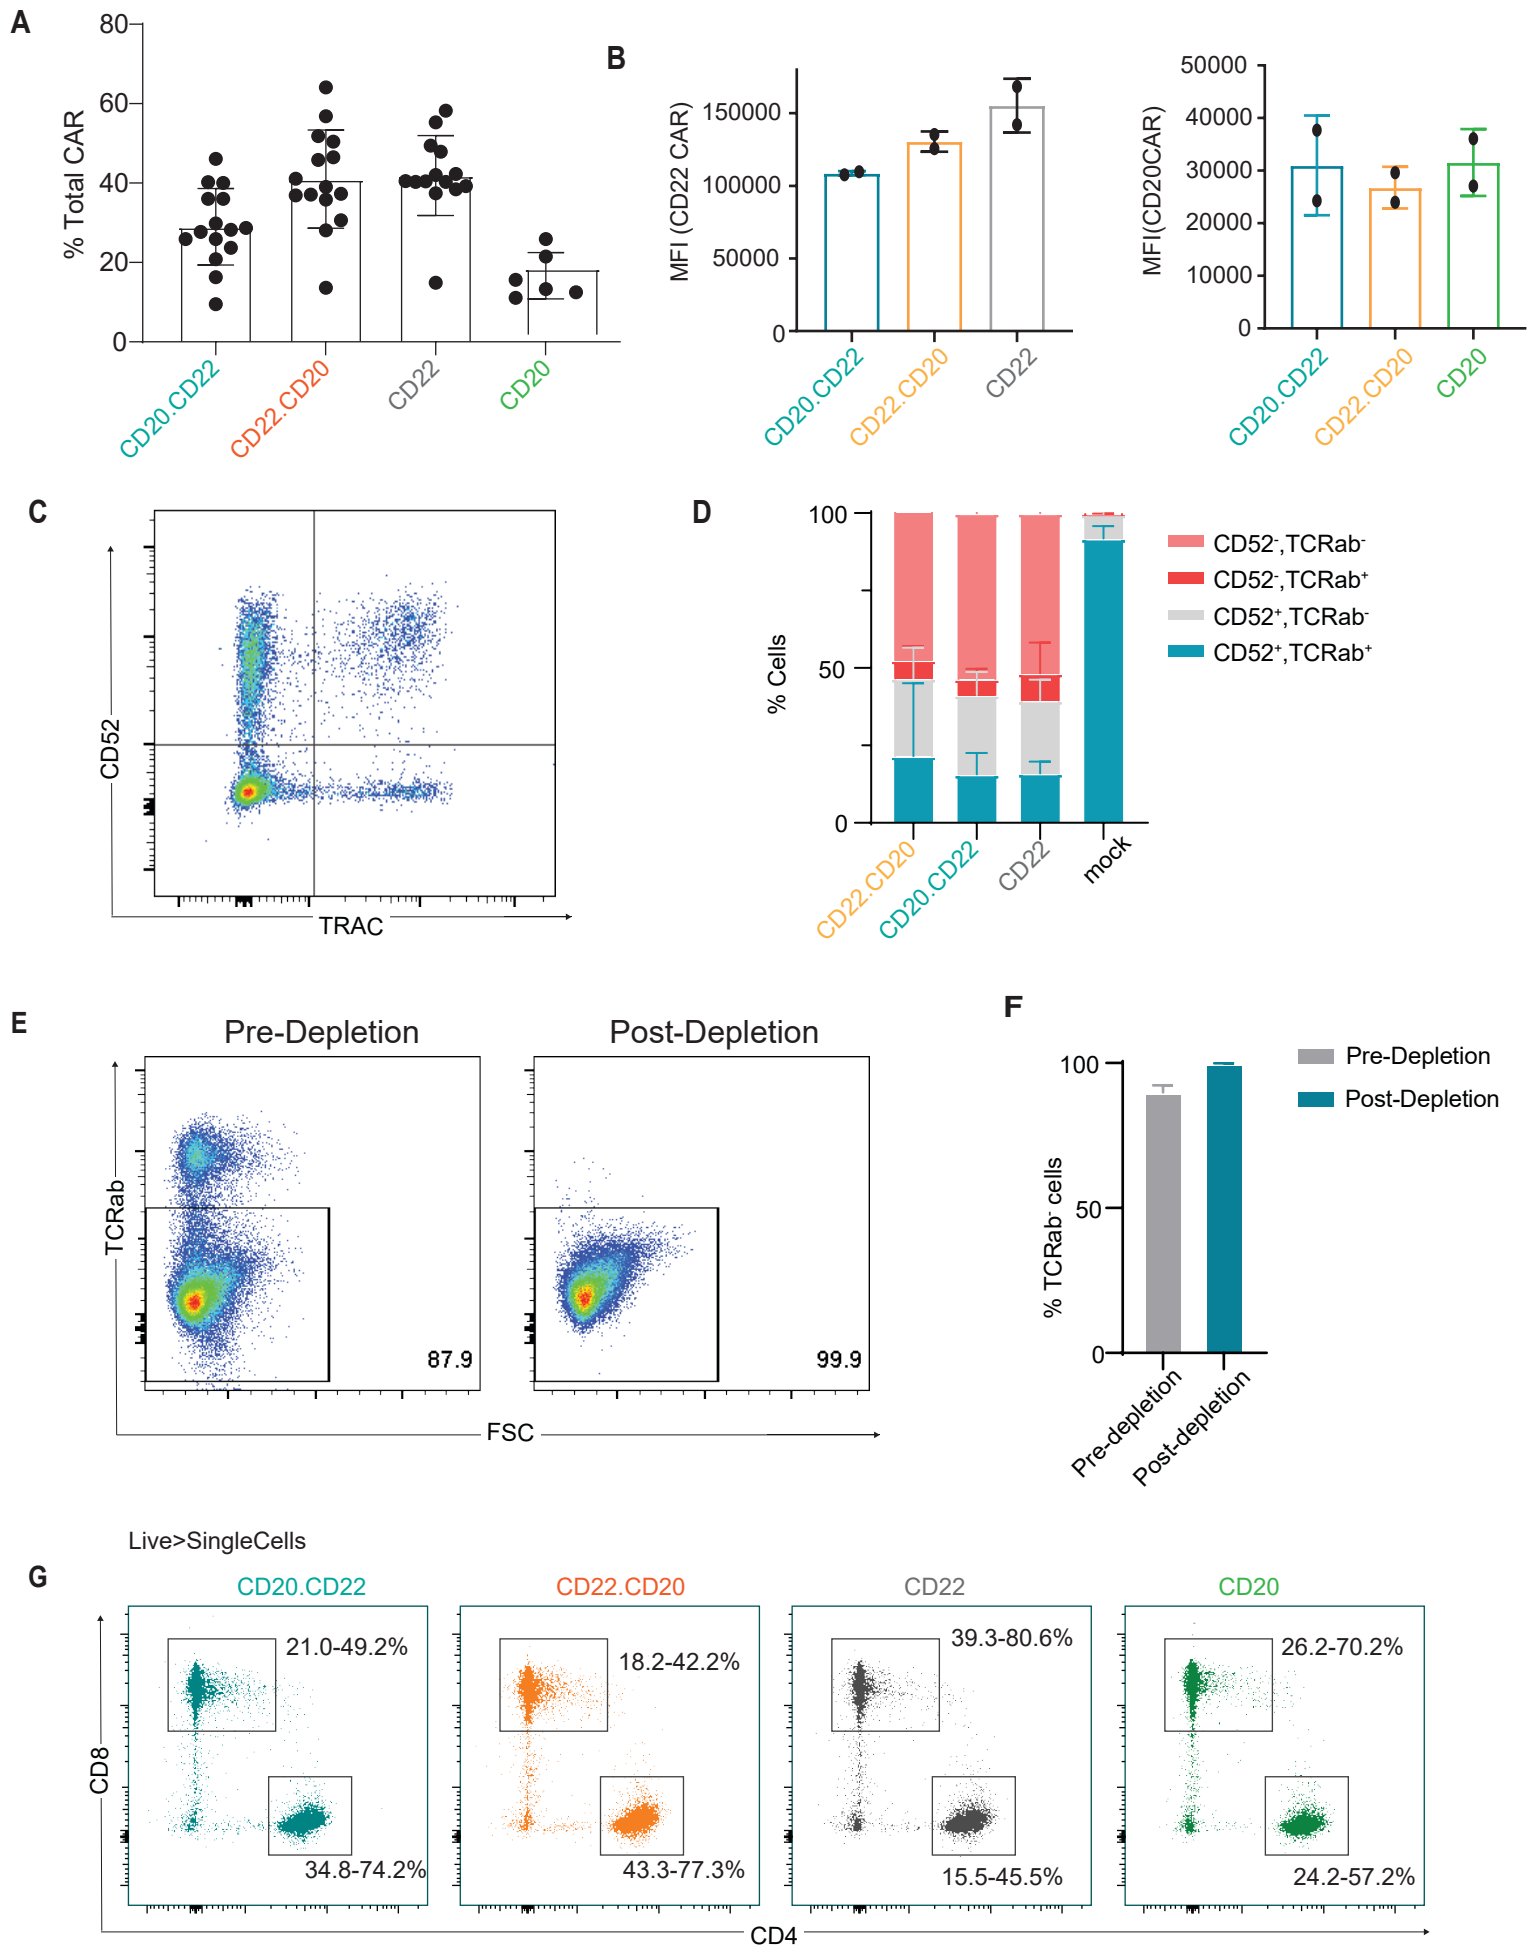

Supplementary Figure S4

A

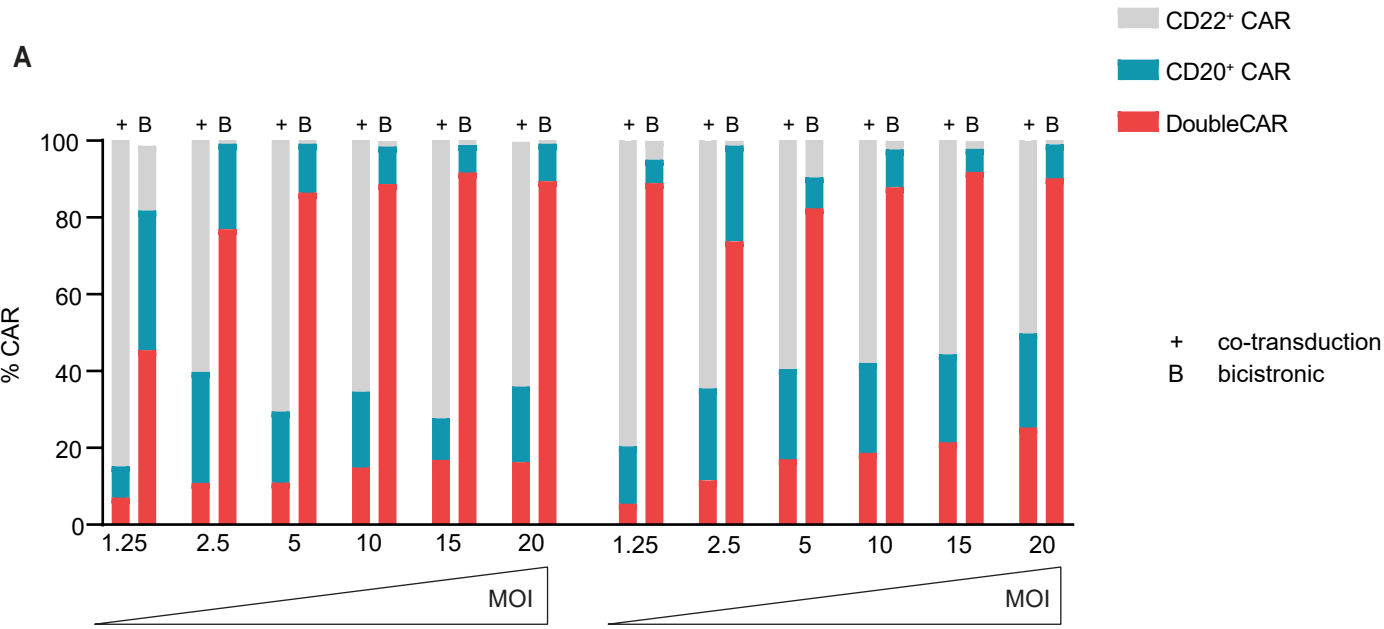

B

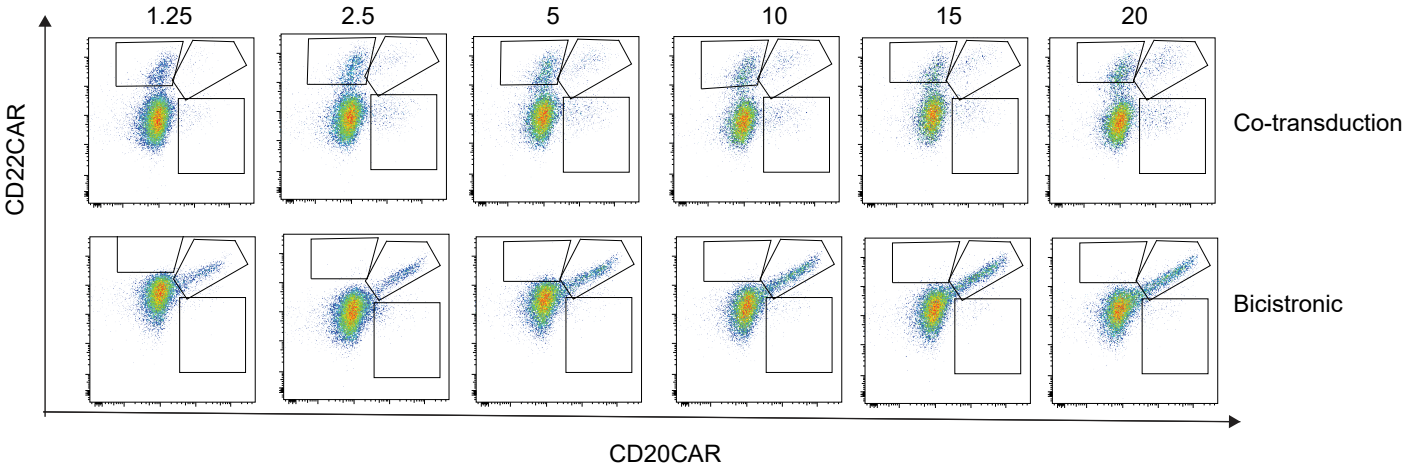

**Supplementary Figure S5**

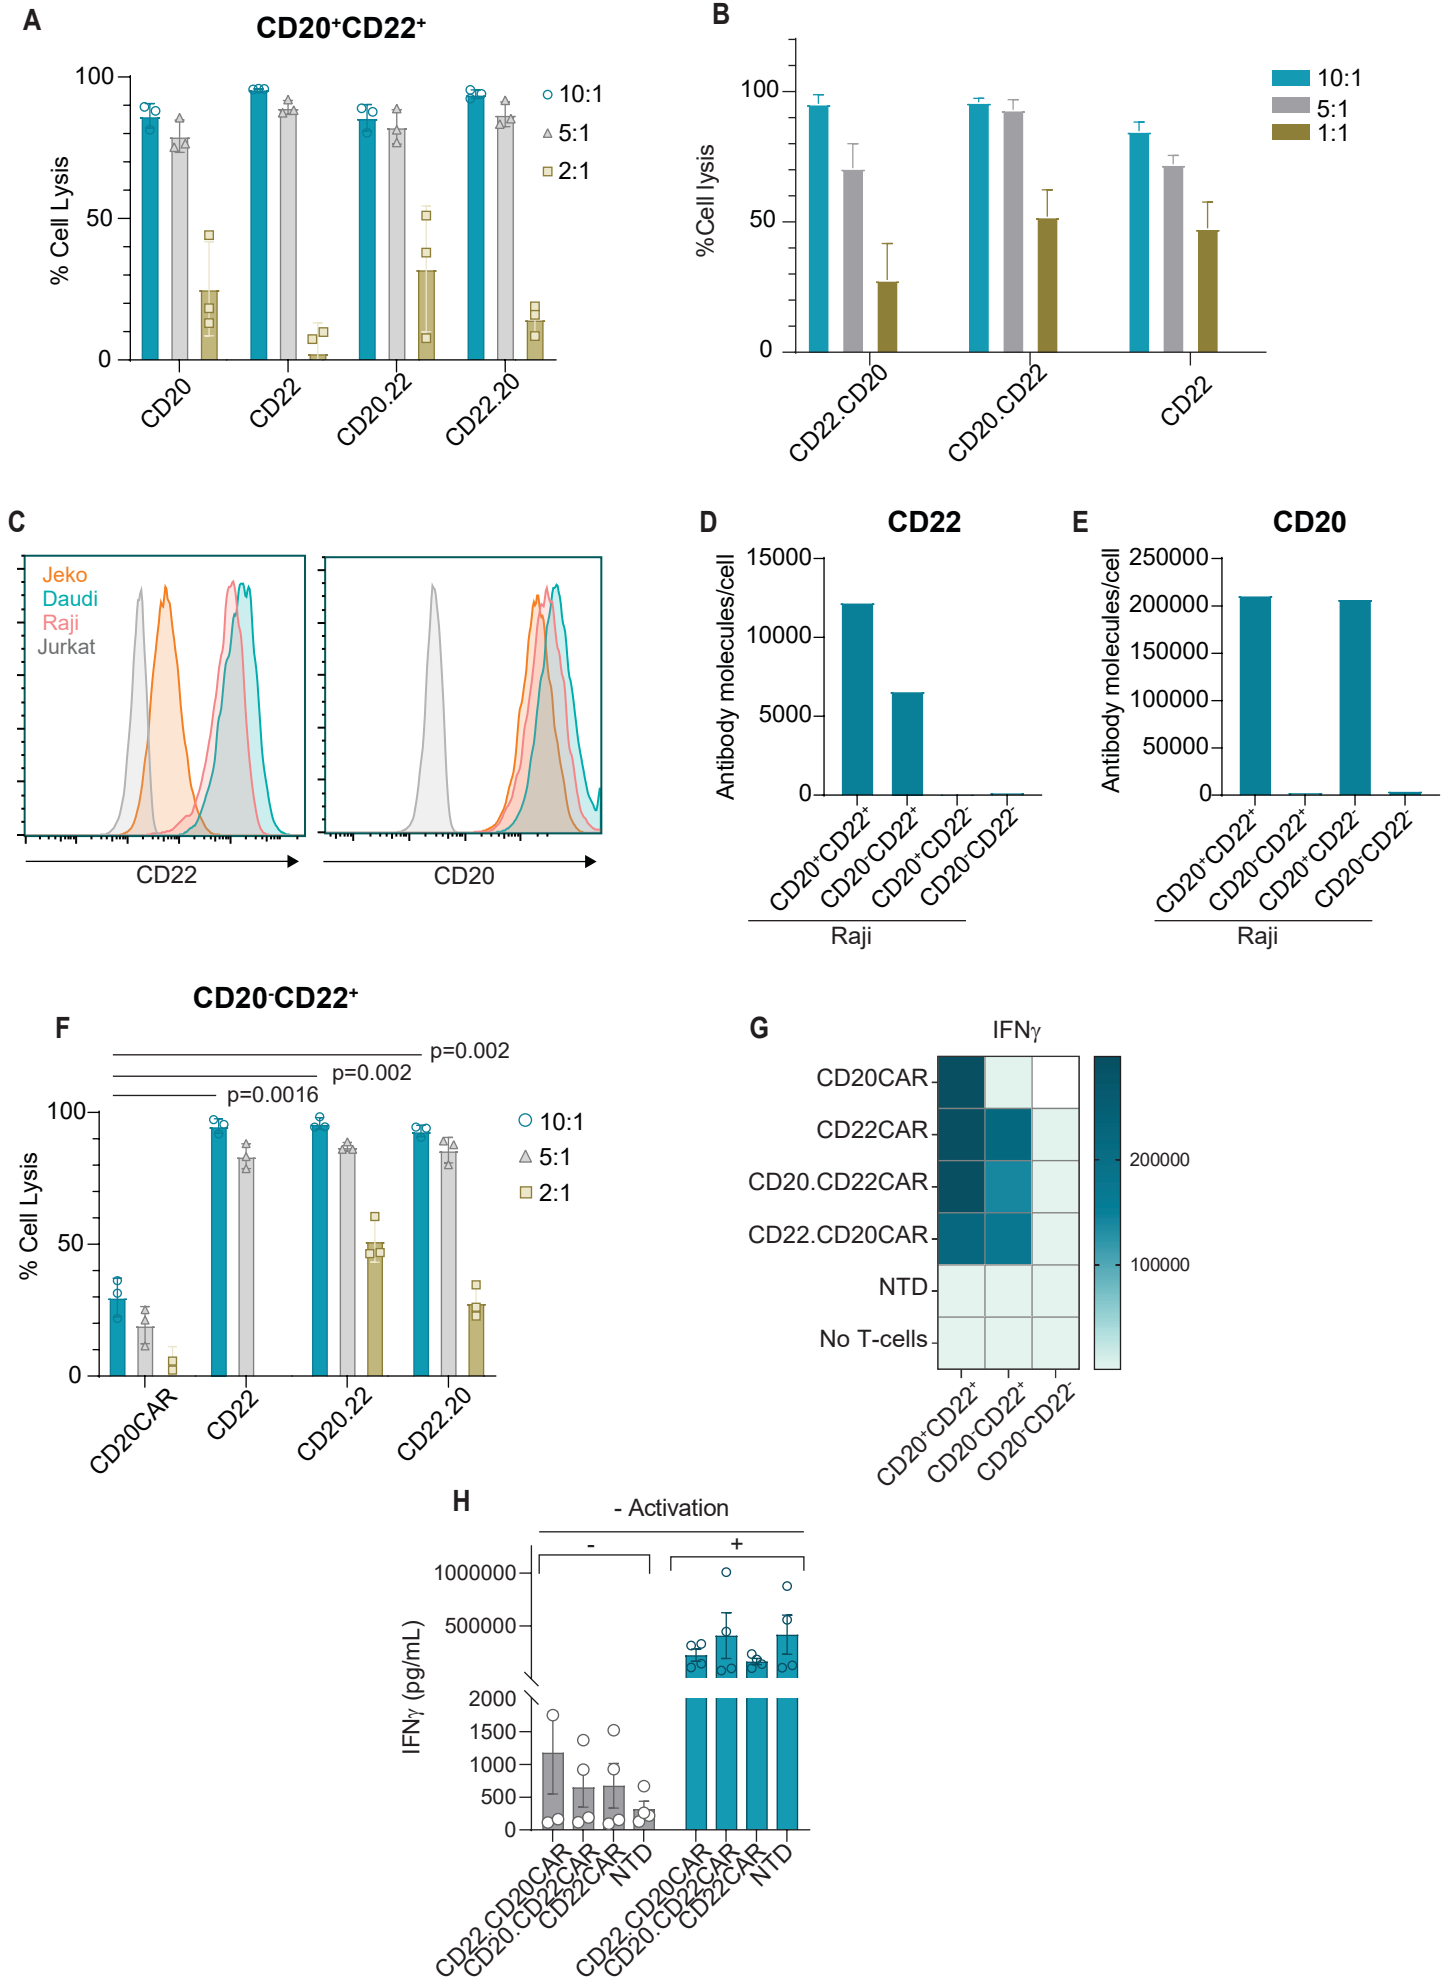



# Supplementary Figure S7

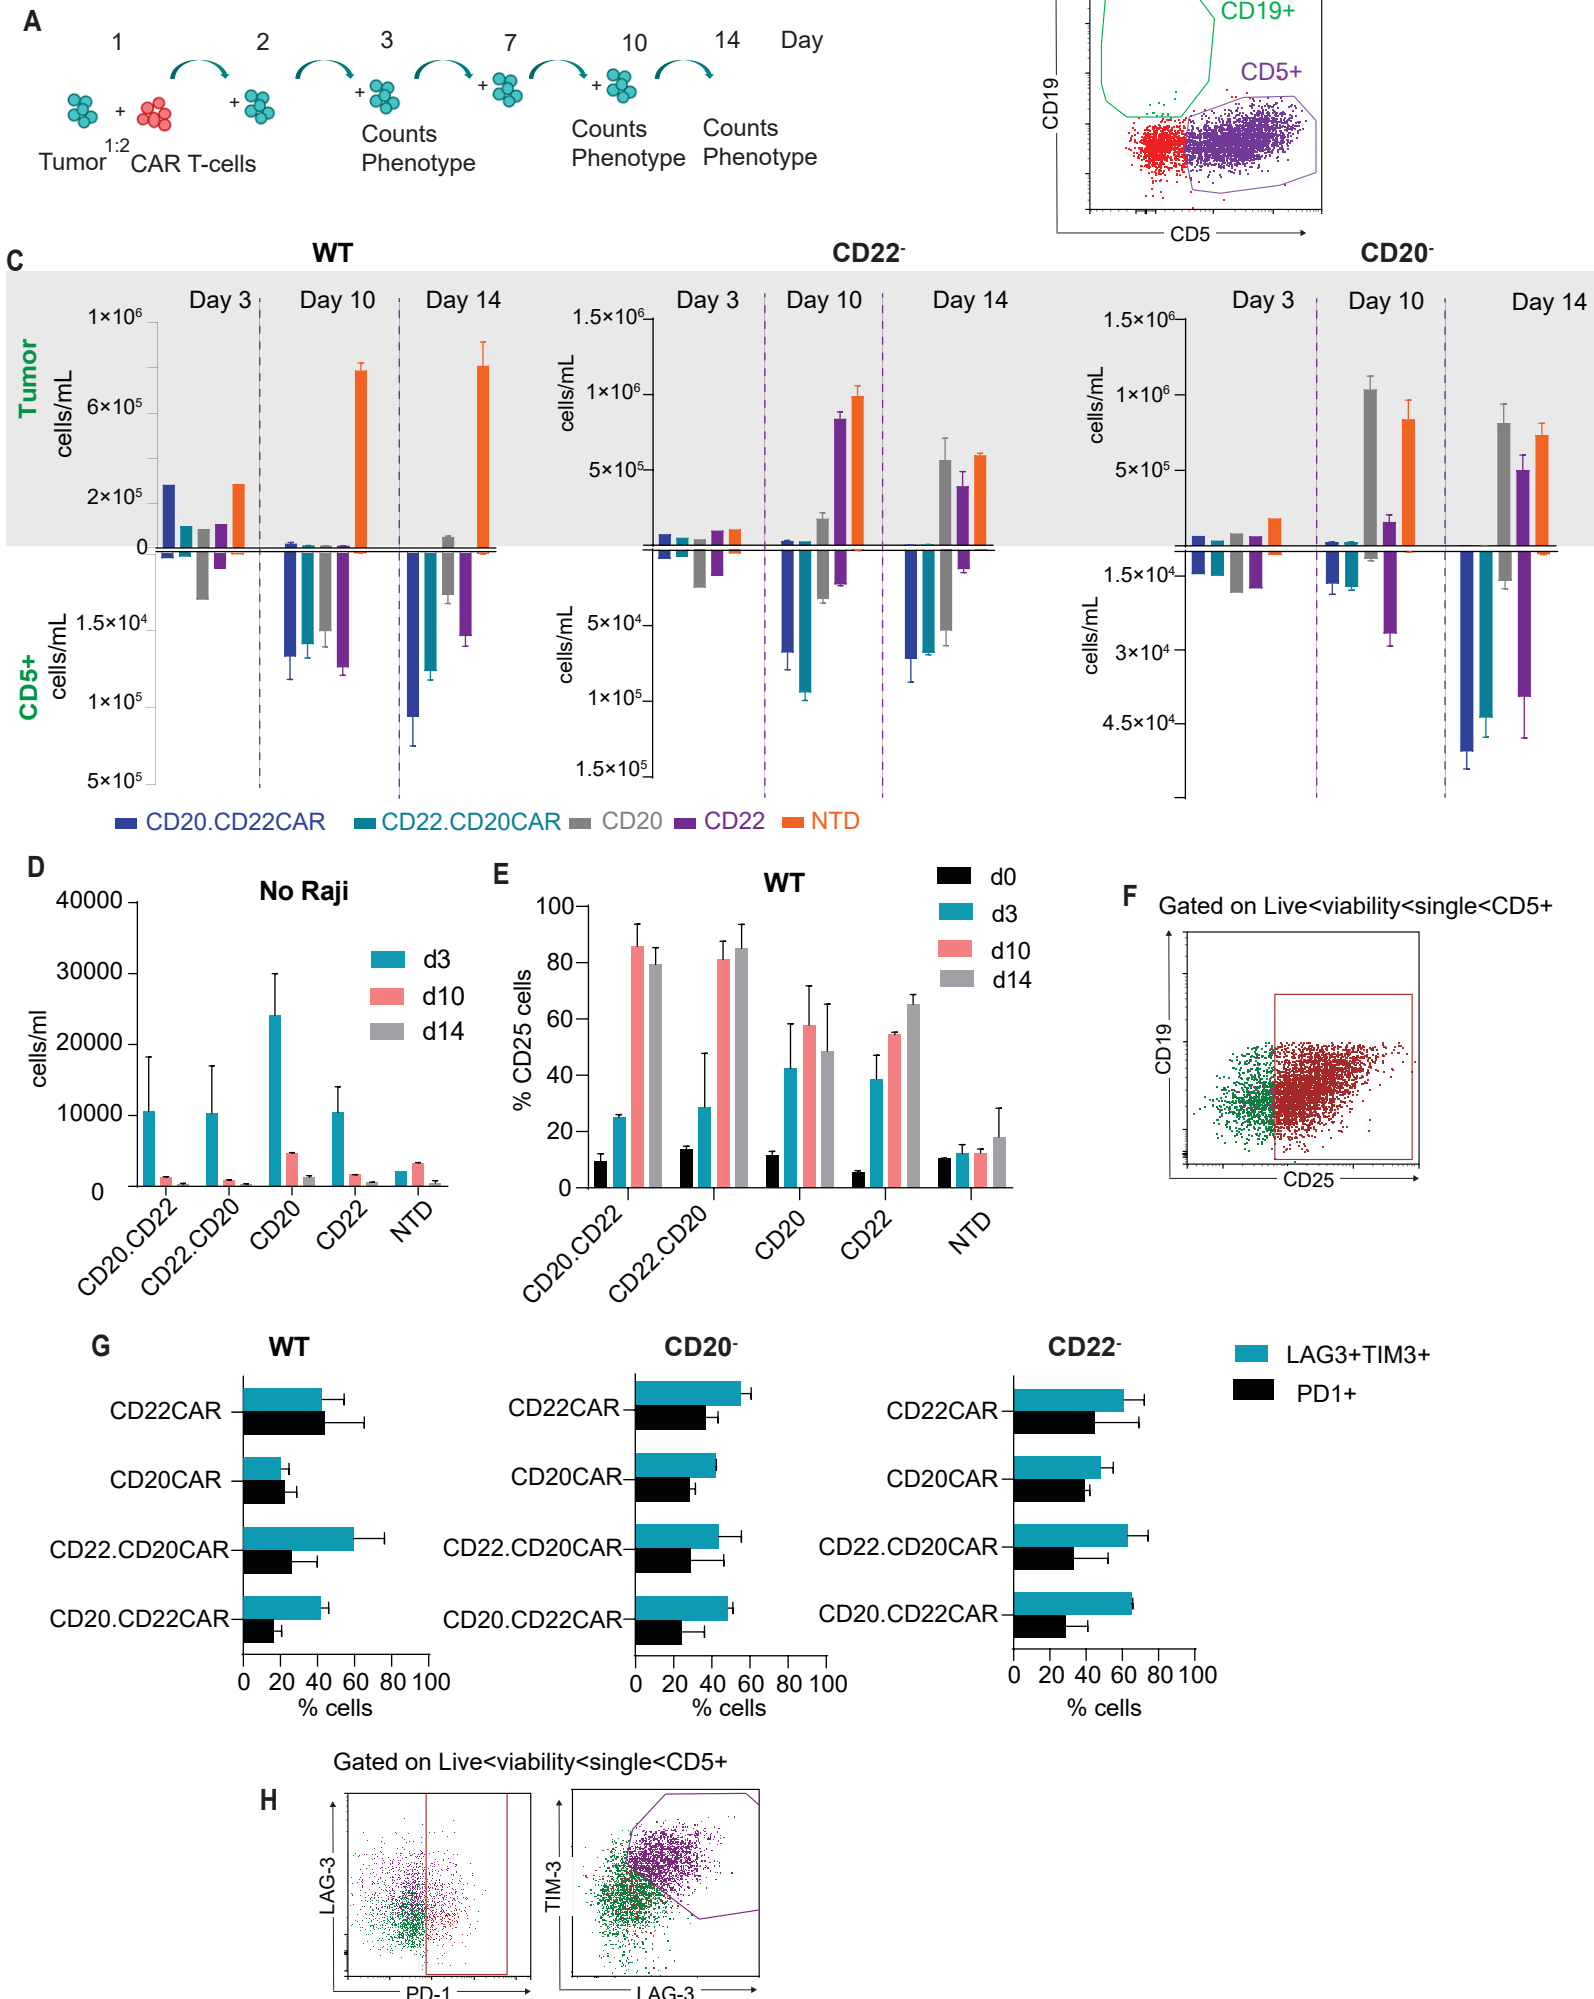

# Supplementary Figure S8

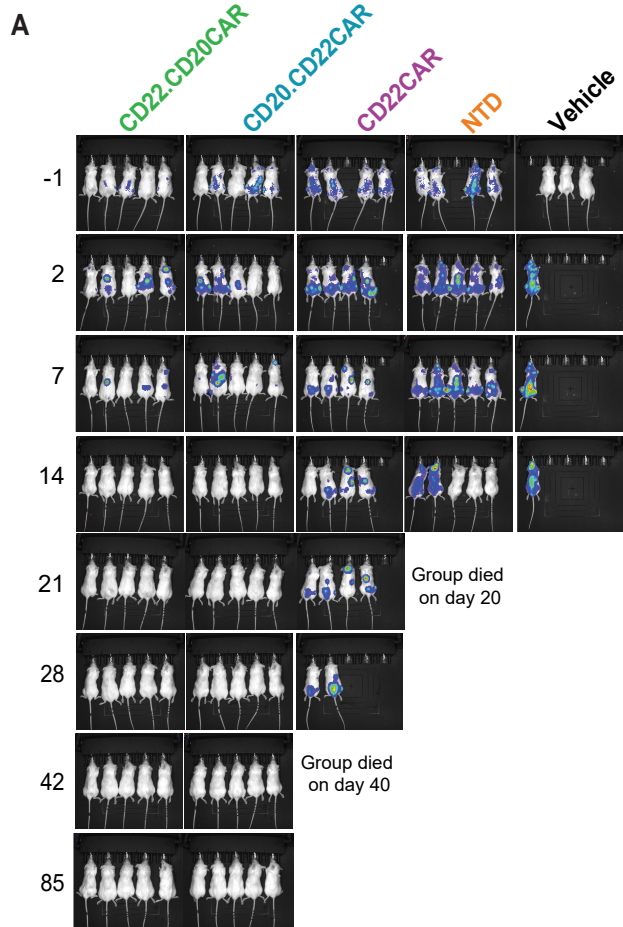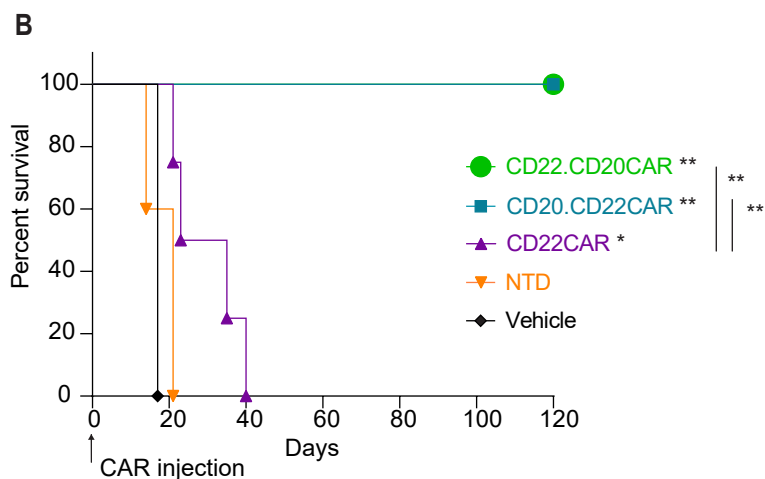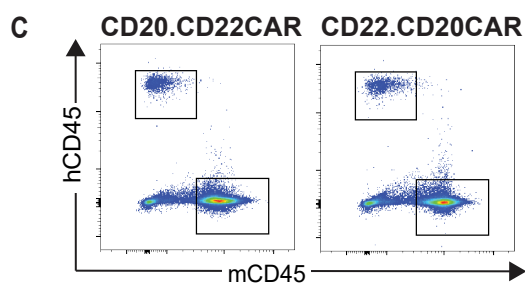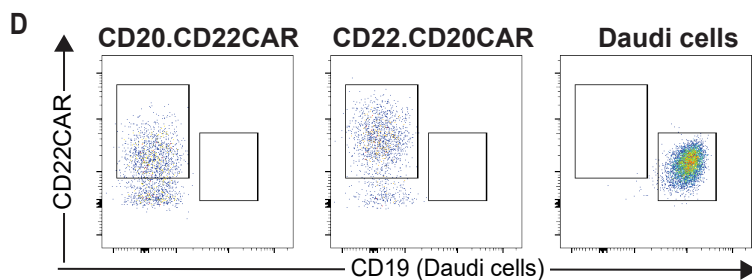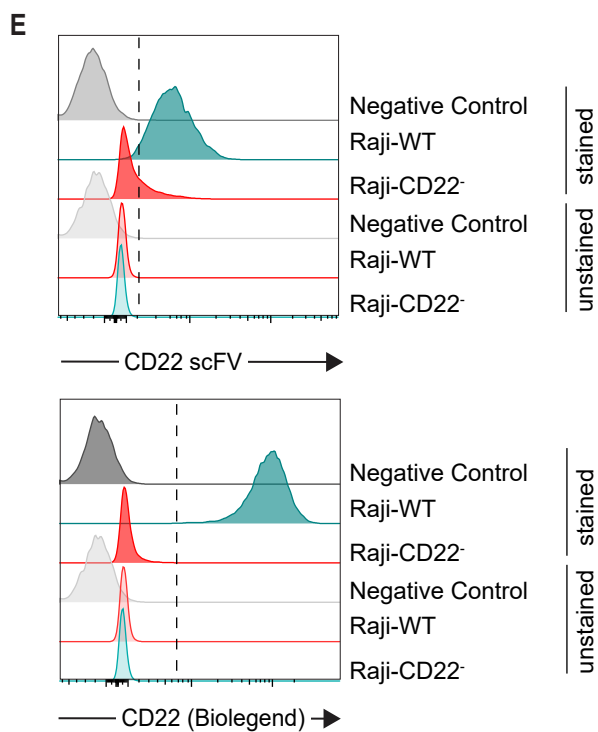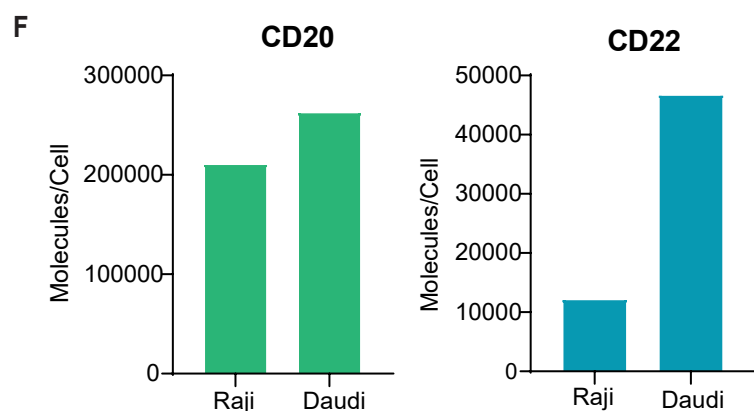



# Supplementary Figure S9

**A**

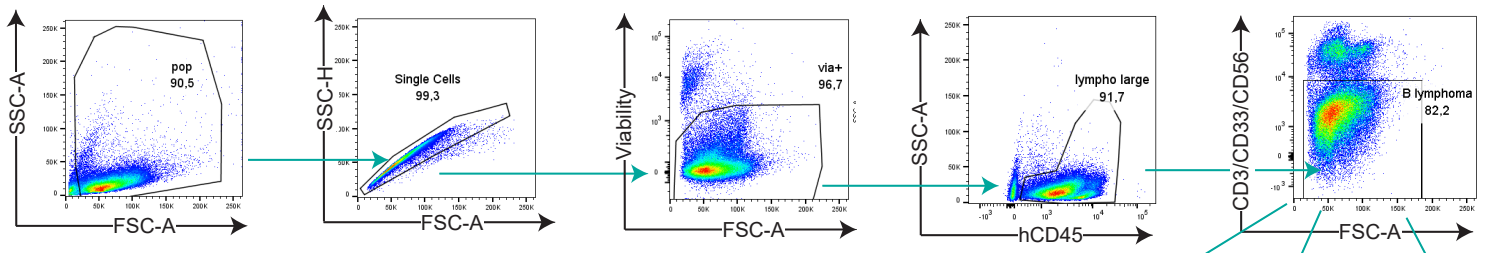

**B**

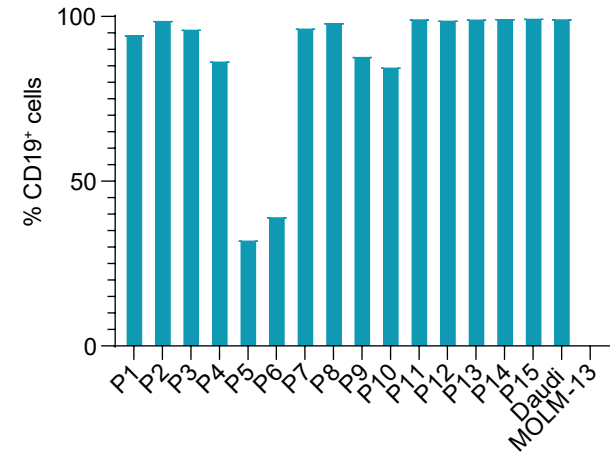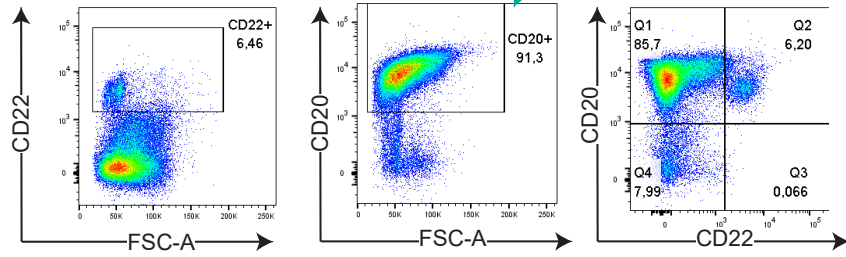

**C**

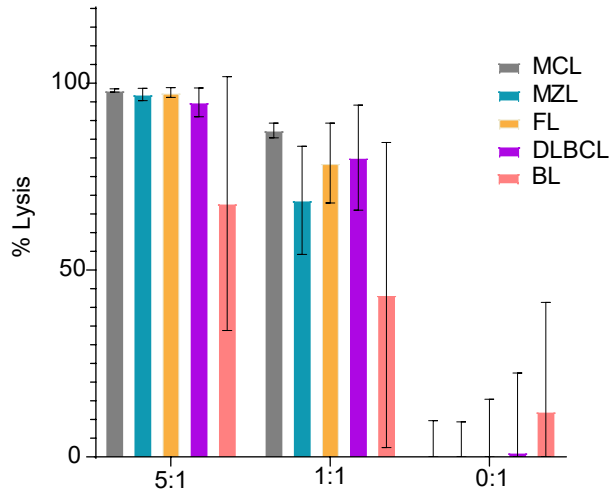

**D**

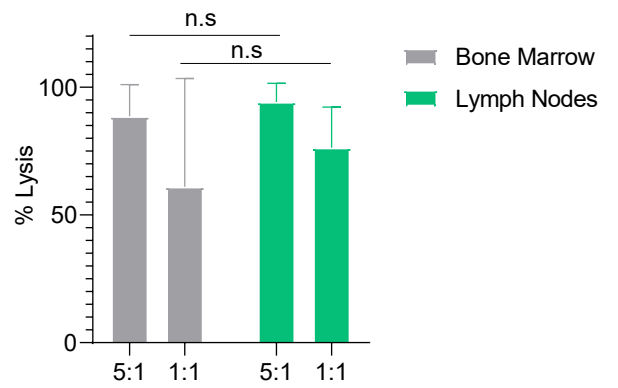

# Supplementary Figure S10

A

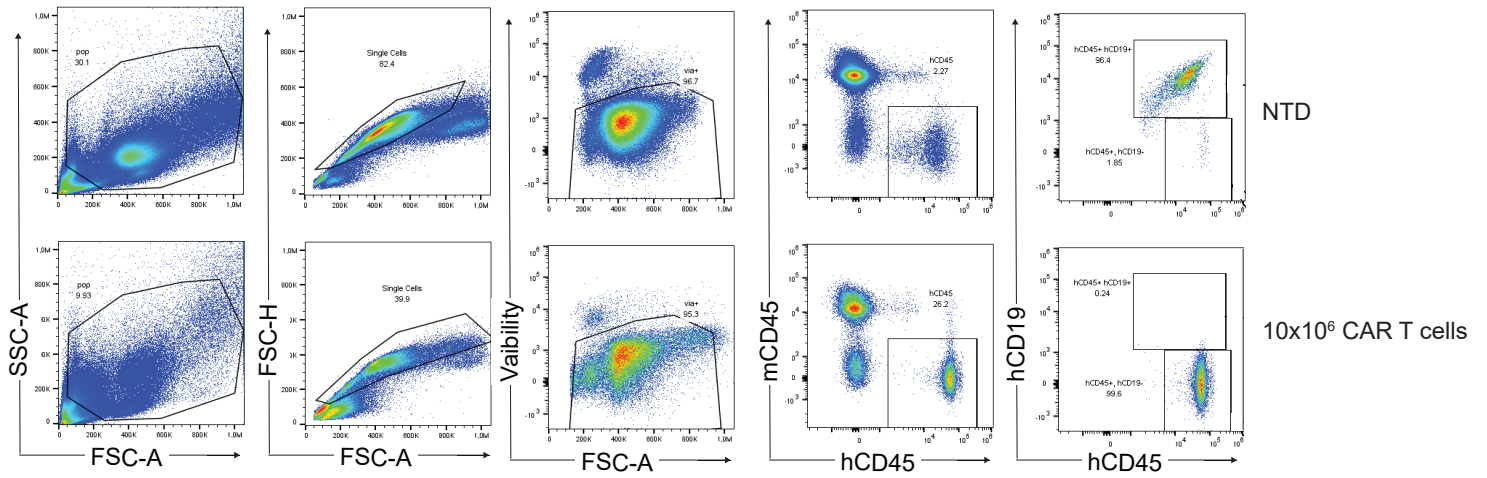

Supplement: cir-22-0910_supplementary_data_suppst1-st4_sf1-sf10.pdf [file cir-22-0910_supplementary_data_suppst1-st4_sf1-sf10.pdf]
